28 ecological opportunities that promoted radiation into many new niches. Our study also provides a  
29 solid, time-calibrated, evolutionary framework to accelerate research on this overlooked, yet globally  
30 important taxon.

31

32 **Keywords:** Amphipoda, Cenozoic, climatic cooling, ecological radiation, molecular phylogeny,  
33 tectonic reconfiguration

34

### 35 **Introduction**

36 Global environmental changes shaped biodiversity patterns throughout Earth's history (Roelants *et al.*  
37 2007; Hannisdal & Peters 2011; Condamine *et al.* 2013). Understanding the historical factors that  
38 triggered large-scale evolutionary radiations or extinctions remains a central tenet in evolutionary  
39 biology. Investigating the effects of these past changes at the planetary level requires suitable model  
40 systems which can be represented by species rich taxonomic groups with a global distribution and  
41 high ecological diversity.

42 The Amphipoda is among the most ecologically diverse and speciose crustacean orders,  
43 encompassing over 10,000 species (Arfianti *et al.* 2018; Horton *et al.* 2019) inhabiting all aquatic  
44 environments worldwide, from hadal depths to alpine freshwater streams, from lightless groundwater  
45 to tropical forests, and from sea bottom sediments to the entrails of gelatinous plankton (Bousfield  
46 1983; Barnard & Karaman 1991; Lowry & Myers 2017). Amphipods are highly abundant and have an  
47 important function in structuring aquatic communities (Oliver *et al.* 1982; Duffy & Hay 2000;  
48 González *et al.* 2008; Best & Stachowicz 2014). Furthermore, due to their omnivorous diet and  
49 intermediary trophic position, they represent a key link between trophic levels, thus playing an  
50 essential role in nutrient recycling (Dangles & Malmqvist 2004; Piscart *et al.* 2011; Machado *et al.*  
51 2019). The dispersal abilities of amphipods are poor due to egg brooding, lack of free-swimming  
52 larvae and extended parental care (Barnard & Karaman 1991; Thiel 1999; Väinölä *et al.* 2008).  
53 Consequently, populations can easily become genetically isolated, leading to high species diversity  
54 and biogeographical patterns which accurately reflect ancient historical events (Finston *et al.* 2007;

55 Hou *et al.* 2011; Bauzà-Ribot *et al.* 2012; Copilaş-Ciocianu & Petrusek 2017; Copilaş-Ciocianu *et al.*  
56 2019). Lastly, amphipods are emerging model organisms for research on development, regeneration,  
57 ecotoxicology and evolutionary biology (Fišer 2012; Weston *et al.* 2013; Kao *et al.* 2016; Naumenko  
58 *et al.* 2017; Fišer *et al.* 2018).

59 Despite global distribution, high abundance, ecological significance, and importance as  
60 emerging model organisms, only little is known about the evolutionary history of amphipods and the  
61 factors that triggered their impressive radiation. This scarcity of knowledge is due to several critical  
62 factors. Deep evolutionary relationships within the Amphipoda are uncertain. The most  
63 comprehensive phylogenetic studies were based on morphology (Lowry & Myers 2013, 2017), which  
64 is known to be highly homoplastic in amphipods (Berge *et al.* 2000). Indeed, molecular phylogenies at  
65 lower taxonomic levels do not fully agree with the morphology-based systematics (Macdonald *et al.*  
66 2005; Havermans *et al.* 2010; Hurt *et al.* 2013; Esmaeili-Rineh *et al.* 2015; Hou & Sket 2016; Mamos  
67 *et al.* 2016; Verheye *et al.* 2016; Copilaş-Ciocianu *et al.* 2019). The age of the order is puzzling as  
68 well. It has been suggested that amphipods already appeared in the Late Palaeozoic, when the lineages  
69 of the superorder Peracarida split (Bousfield 1977, 1978; Schram 1986). Yet, unlike the rest of  
70 peracaridan orders with pre-Cenozoic fossil record (Schram 1986; Wolfe *et al.* 2016), the handful of  
71 amphipod fossil taxa are dated no earlier than Eocene and usually bear a modern appearance  
72 (Derzhavin 1927; Bousfield & Poinar 1994; Coleman 2006; Kupryjanowicz & Jażdżewski 2010).  
73 Hence, the temporal origin and main cladogenetic events of modern amphipods are not known and  
74 cannot be paralleled to main global environmental changes.

75 The present view on the modern diversity of amphipods can be summarised by two competing  
76 hypotheses. The first hypothesis, stating that most of the modern diversity has been attained by the end  
77 of the Palaeozoic or Early Mesozoic, is based on the current distribution of superfamilies in  
78 relationship to geochronology, cladistic relationships, or on patterns observed in related  
79 malacostracans (Barnard & Barnard 1983; Lowry & Myers 2013). The alternative hypothesis suggests  
80 that the diversity of amphipods could be much younger due to morphological continuity among higher  
81 taxa, and due to lower taxonomic diversity in terrestrial and deep-sea habitats in comparison to the

82 closely related isopods (Bousfield 1978). Molecular phylogenetic studies tend to support this view  
83 because they indicate that the onset of diversification of several major amphipod clades dates to the  
84 Cretaceous/Palaeogene (Hou *et al.* 2014; McInerney *et al.* 2014; Corrigan *et al.* 2014; Verheye *et al.*  
85 2017; Copilaş-Ciocianu *et al.* 2019). Apart from the recent fossil record and molecular timetrees,  
86 several other independent lines of evidence point out to a more recent radiation of amphipods.  
87 Amphipods are particularly cold adapted animals, exhibiting an inverse latitudinal richness gradient in  
88 marine and freshwater habitats (Barnard 1976; Barnard & Barnard 1983; Barnard & Karaman 1991;  
89 Väinölä *et al.* 2008; Rivadeneira *et al.* 2011; Copilaş-Ciocianu *et al.* 2019), and high diversity and  
90 dominance in the cold, deep-sea benthic assemblages (De Broyer *et al.* 2004; Verheye *et al.* 2017;  
91 Havermans & Smetacek 2018). This pattern is probably related to their generally low tolerance to  
92 hypoxia, given that warmer water has a lower concentration of dissolved oxygen (Modig & Ólafsson  
93 1998; Wiklund & Sundelin 2001; Wu & Or 2005; Vaquer-Sunyer & Duarte 2008). As such, it seems  
94 unlikely that amphipods could have attained most of their current ecological disparity during the Early  
95 to Middle Mesozoic (Triassic to Early Cretaceous), a period characterized by warm temperatures even  
96 in the deep-sea, by weakly stratified oceans and frequent anoxic events that caused major extinctions  
97 (Lear *et al.* 2000; Jacobs & Lindberg 2002; McClain & Hardy 2010). Therefore, we hypothesize that  
98 amphipods ecologically radiated in the Late Mesozoic/Cenozoic, when large-scale continental  
99 reconfiguration induced global climatic cooling, causing the oceans to transition to a thermohaline  
100 (two-layered) circulation which, in turn, increased productivity and oxygenation levels (McClain &  
101 Hardy 2010; Donnadieu *et al.* 2016; Mills *et al.* 2019). To test our hypothesis, we generated the first  
102 large-scale, time calibrated molecular phylogeny of the Amphipoda and reconstructed the course of  
103 diversification and ecological transitions. We focused on the timing of major cladogenetic events and  
104 ecological transitions.

105

106

## 107 **Materials and Methods**

108 *Data collection and sequence alignment*

109 As a taxonomic backbone for data collection we used the classification on the World Register  
110 of Marine Species database (WoRMS; <http://www.marinespecies.org/>) which is based on Lowry &  
111 Myers (2017). All the data used in the present study is publicly available in GenBank  
112 ([www.ncbi.nlm.nih.gov/genbank](http://www.ncbi.nlm.nih.gov/genbank)) and originates from 63 published and 13 unpublished studies (a list  
113 of the data sources is found in Appendix 1 and Table S1; data collection ended in January 2018). Taxa  
114 were included in a way that we would cover as much phylogenetic and ecological diversity as  
115 possible. Maximizing phylogenetic diversity diminishes the effect of long-branch attraction and  
116 increases topological accuracy by dispersing homoplasy across the tree (Heath *et al.* 2008). In most  
117 cases, we included one representative species per genus. We selected four molecular markers based on  
118 their abundance and representativeness for all main clades: the mitochondrial cytochrome c oxidase  
119 subunit I (COI), the nuclear ribosomal RNA for the large and small subunits (28S and 18S), and the  
120 nuclear histone 3 (H3). All sequences were screened for contamination, presence of stop codons and  
121 homology. Preliminary gene trees were constructed for each marker to identify and eliminate  
122 unreliable sequences. To properly root the phylogeny, we included nine outgroups representatives: the  
123 sister order Ingolfiellida, as well as other members of the Peracarida and Decapoda. The dataset  
124 contained 210 (201 ingroup) terminals, representing 102 of the 226 recognized families (45%) (Table  
125 S1).

126 The PhyRe python script (Plazzi *et al.* 2010) was used to assess the phylogenetic  
127 representativeness of our dataset. The analysis was run at the genus level and the reference taxonomy  
128 was obtained from the WoRMS database. Confidence intervals for the average and the variation in  
129 taxonomic distinctness were calculated using 1000 random replicates.

130 The protein coding COI and H3 sequences were aligned with MUSCLE (Edgar 2004) in  
131 MEGA 6 (Tamura *et al.* 2013) and amino acid translated to check for premature stop codons  
132 (indicating pseudogenes). Following Copilaş-Ciocianu *et al.* (2018), we separately aligned the 18S and  
133 28S rRNA sequences with SATé 2.2.7 (Liu *et al.* 2012). SATé simultaneously co-estimates the  
134 alignment and phylogenetic tree, which makes it far more accurate than other alignment methods  
135 (Mirarab *et al.* 2015). MAFFT 6.7 (Katoch *et al.* 2005) was used as the aligner and OPAL 1.0.3

136 (Wheeler & Kececioglu 2007) as the merger because this combination provides the highest  
137 phylogenetic accuracy (Liu & Warnow 2014). For tree inference we used the maximum-likelihood  
138 method implemented in FastTree 2.1.4 (Price *et al.* 2010) with the GTR+G20 substitution model. The  
139 cycle of alignment and tree building was repeated ten times for each marker. The alignments with the  
140 best likelihood score were used as input for final tree estimation and statistical support analyses (see  
141 *Phylogenetic reconstruction*). Gblocks 0.9 (Talavera & Castresana 2007) was used to remove poorly  
142 aligned regions with questionable homology in the 18S and 28S alignments. Minimum restrictive  
143 settings were applied and regions with gap positions were allowed in the final alignment. The final  
144 alignment length was 1741 bp for 18S, 883 bp for 28S, 436 bp for COI (third codon position removed;  
145 see next section), and 327 bp for H3, totalling 3387 bp. Individual marker alignments were  
146 concatenated using Sequence Matrix (Vaidya *et al.* 2011). The degree of missing data was 29%. The  
147 alignment in NEXUS format is available on Figshare (doi available after acceptance).

148         Ecological data regarding habitat (marine, freshwater and terrestrial; benthic vs. pelagic),  
149 mode of life (free vs. symbiotic), depth (littoral/epipelagic, shelf/mesopelagic, bathyal/bathypelagic,  
150 abyssal/abyssalpelagic and hadal/hadalpelagic) and temperature (cold vs. warm) were gathered from  
151 the relevant literature at the genus level (Bazikalova 1945; Laval 1980; Barnard & Barnard 1983;  
152 Barnard & Karaman 1991; Vinogradov *et al.* 1996; de Broyer *et al.* 2007). Note that “symbiotic mode  
153 of life” encompasses different types of symbiosis (commensalism, parasitism, and amensalism). The  
154 depth zone was attributed on the mean depth value, obtained from the minimum and maximum values  
155 for depth ranges of each taxon. A taxon was considered as cold water distributed when its  
156 representatives occurred at high to temperate latitudes or deeper than 1000 m. Similarly, a taxon was  
157 classified as warm water when its representatives were distributed in tropical to temperate waters  
158 above 1000 m depth. All ecological data can be found in the supplementary information (Table S2).  
159 To provide an overview of the geographic distribution of clades, we also gathered distribution data  
160 which was obtained from Barnard & Karaman (1991). Terminals were assigned to 17 geographical  
161 areas (Table S2).

162

163 *Phylogenetic reconstruction*

164 We evaluated the level of substitution saturation of each marker using the index of Xia et al. (2003)  
165 implemented in DAMBE 5.3.10 (Xia & Xie 2003). Significant levels of saturation were detected at the  
166 COI 3<sup>rd</sup> codon position ( $I_{ss} > I_{ss,c}$ ,  $p = 0.0001$ ), and, as such, these sites were not included in the  
167 phylogenetic analyses. Variable and parsimony informative sites were calculated in MEGA. The  
168 concatenated alignment contained 1917 parsimony informative out of 2333 variable sites (18S:  
169 1006/1273; 28S: 575/667; COI: 209/251; H3: 127/142). Best-fitting evolutionary models were  
170 selected using PartitionFinder 2 (Lanfear *et al.* 2017) under the Bayesian Information Criterion and  
171 greedy search option.

172 Phylogenetic relationships were inferred using maximum likelihood (ML), Bayesian inference  
173 (BI) and maximum parsimony (MP) methods. The ML analyses were conducted with IQTREE 1.6  
174 (Nguyen *et al.* 2015) and RAxML HPC 8.2.10 (Stamatakis 2014). The IQTREE search was performed  
175 under an edge-linked partitioned model (applied to each gene partition), using the GTR model with  
176 free rate heterogeneity (+R) which relaxes the assumption of Gamma distributed rates and has a better  
177 fit to large and complex datasets (Yang 1995; Soubrier *et al.* 2012). Statistical support for branches  
178 was assessed using 1000 ultra-fast bootstrap replicates (UFBS; Hoang et al. 2018) and the Shimodaira-  
179 Hasegawa approximate likelihood ratio test (SH-aLRT; Shimodaira and Hasegawa 1999, Guindon et  
180 al. 2010). The RAxML analysis was run with the GTR+ $\Gamma$  model applied to each gene partition. A  
181 thorough ML search was performed and 1000 rapid bootstrap replicates (RBS) were used to assess  
182 branch support. Bayesian analyses were performed with ExaBayes 1.5 (Aberer *et al.* 2014) under the  
183 GTR+ $\Gamma$  model applied to each gene partition. All parameters (except branch length) were unlinked  
184 and rates were allowed to vary independently. The analysis was run for  $10^7$  iterations, with a thinning  
185 of 500 and 50% burn-in. The value for the parsimony subtree pruning and regrafting (SPR) radius  
186 parameter was set to 50 and the number of swaps per generation to 10. Maximum parsimony was  
187 performed with PAUP\* 4.0a164 (Swofford 2002), using heuristic searches with TBR branch swapping  
188 and 1000 random taxon additions. Only phylogenetically informative sites were retained, gaps were  
189 treated as missing data, and all characters were unordered and equally weighted. Nodal support was

190 estimated with 500 jackknifing replicates (JK) with 50% character removal. All phylogenetic analyses  
191 were performed on the CIPRES Science Gateway v3.3 (Miller *et al.* 2010).

192

### 193 *Molecular dating*

194 Molecular dating was performed in BEAST 1.8.2 (Drummond *et al.* 2012) using the GTR+I+ $\Gamma$  model  
195 for COI and H3, and SYM+I+ $\Gamma$  for 18S and 28S (as selected with PartitionFinder). The ML  
196 phylogram from the IQTREE analysis was used as a starting tree in order to reduce computational  
197 time. An uncorrelated relaxed clock with a lognormal distribution was applied to each partition and  
198 speciation was modelled using the Birth-Death process. The MCMC chain was run for 10<sup>8</sup>  
199 generations, with a sampling frequency of 2000. Convergence of parameters and effective sample size  
200 were assessed with Tracer 1.6 (Rambaut *et al.* 2014) after discarding 20% of trees as burn-in. We  
201 performed three independent runs, which gave the same result. As such, all runs were combined using  
202 LogCombiner 1.8.2 and the maximum clade credibility tree was produced with TreeAnnotator 1.8.2,  
203 both part of the BEAST package.

204 For divergence times estimation we employed the fossil calibration scheme described in detail  
205 by Copilaş-Ciocianu *et al.* (2019), to which we added one more calibration point. Only fossil taxa that  
206 are well studied and represented by several specimens were used for calibration. All calibration nodes  
207 were assigned exponential prior distributions since they require fewer parameters and are more  
208 appropriate when the fossil record of the focal group is poorly known (Ho & Phillips 2009). Briefly,  
209 we used five calibration points, the youngest (node 1), representing the origin of the Ponto-Caspian  
210 gammarid amphipod radiation, was set to a minimum age of 9 Ma (mean = 25, offset = 8, 95%  
211 HPD = 9–83) based on Caucasian fossil specimens (Derzhavin 1927). The  
212 Niphargidae/Pseudoniphargidae and Crangonyctidae/Pseudocrangonyctidae splits (nodes 2 and 3,  
213 respectively) were set at a minimum of 35 Ma (mean = 60, offset = 35, 95% HPD = 38–215) based  
214 on Eocene Baltic amber fossils (Coleman & Myers 2000; Coleman 2004, 2006; Kupryjanowicz &  
215 Jazdzewski 2010). The additional calibration point (node 4) that we use in this study is based on



216 Miocene amber specimens of the family Talitridae from Central America (Bousfield & Poinar 1994,  
217 1995). The minimum age was set to 25 Ma (mean = 30, offset = 21, 95% HPD = 22–111) and was  
218 applied to the stem of the Talitridae because this family has an uncertain phylogenetic position within  
219 the Talitroid clade of our phylogeny. Finally, the oldest calibration point (node 5) was placed as close  
220 to the root as possible (following Duchêne *et al.* 2014), and represents the oldest known member of  
221 Eumalacostraca, *Palaeopalaemon newberry* Whitfield, 1880 (minimum = 358 Ma, mean = 55, offset =  
222 355, 95% HPD = 358–514) (Schram *et al.* 1978). The nodes do not seem misdated, given that  
223 inconsistency between fossil ages and lineage history was not significant (Shapiro-Wilk normality test,  
224  $W = 0.91$ ,  $p = 0.51$ , see Marshall 2008).

225         Due to the notable difference between the recent amphipod (ingroup) calibration points (9-35  
226 Ma) and the old outgroup (358 Ma) calibration, we also ran two additional analyses, one only with  
227 ingroup calibrations, and one only with the outgroup calibration to assess if they produce compatible  
228 results.

229

### 230 *Diversification through time and ancestral state reconstruction*

231 A sliding window analysis was performed according to Meredith *et al.* (2011) to visually inspect the  
232 tendency of diversification rates through time. The period between 180 and 10 Ma was divided into  
233 sliding windows of 10 Ma, with a frequency of 2.5 Ma. The period prior to 180 Ma was not considered  
234 due to the low number of lineages which would indicate an artificially inflated diversification rate. The  
235 number of lineages originating in a particular sliding window was divided by the number of lineages  
236 occurring prior to the start of that respective sliding window.

237         We reconstructed ancestral states for the five abovementioned ecological traits with the aim of  
238 evaluating the temporal framework of the amphipod ecological transitions. As such, we used the time-  
239 calibrated tree from the BEAST runs in subsequent analyses. Traits were treated as discrete and  
240 analysed with the re-rooting method using maximum likelihood (ML) (Yang *et al.* 1995) as well as  
241 stochastic character mapping (SCM) using Bayesian inference (Bollback 2006), both implemented in

242 R (v.3.5.2) package *phytools* (v.0.6-60) (Revell 2012; R Core Team 2018). ML ancestral state  
243 reconstruction was performed with the *rerootingMethod* function, while SCM with the *make.simmap*  
244 function (Revell 2012). In order to estimate the possible ancestral character states on internal nodes,  
245 we ran 1000 simulations of stochastic character histories, using continuous-time reversible Markov  
246 model parameters of trait evolution, estimated using default settings and the character states on the tips  
247 of the phylogeny.

248 In order to evaluate the tempo of ecological disparification through time, we divided the  
249 phylogenetic history in 10 MY time bins, and calculated the average number of all possible transitions  
250 between states per time bin, as well as for the whole phylogeny. For the sake of clarity, we refer the  
251 term “diversification” to the process of speciation, while we use the term “disparification” to the  
252 process of ecological divergence.

253

## 254 **Results**

### 255 *Dataset*

256 The phylogenetic representative analysis indicated a highly representative taxon sampling. The  
257 Average Taxonomic Distinctiveness (AvTD) and Variation in Taxonomic Distinctiveness (VarTD)  
258 were above the highest AvTD and below the mean VarTD respectively (Fig. S1). Furthermore, von  
259 Euler’s index of imbalance ( $I_E=0.102$ ) was well below the recommended 0.25 threshold value,  
260 indicating unbiased sampling (Plazzi *et al.* 2010) (Fig. S1).

261

### 262 *Phylogenetic reconstruction and molecular dating*

263 All five phylogenetic reconstruction methods yielded congruent results by recovering the same major  
264 clades. All model based methods recovered similar topologies and discordance was observed mainly at  
265 poorly supported nodes (Fig. 1, Figs. S2-S5). Altogether, we identified nine major clades which we  
266 named informally: Gammaroids– mainly northern hemisphere taxa, with freshwater proclivity,  
267 Lysianassoids–mostly deep-sea scavengers, Crangonyctoids– Holarctic freshwater species,  
268 Corophioids– tube-building epifaunal/infaunal marine species, Eusiorids/Iphimedioids– ecologically

269 diverse cold-water marine species, Physosomatans and Physocephalata—exclusively commensal and  
270 parasitic warm-water marine species, most of them pelagic, Talitroids—shallow water, ecologically  
271 diverse containing the only terrestrial lineage, and Atylids—a morphologically plesiomorphic and  
272 cosmopolitan marine group. The following groups were either weakly supported or polyphyletic, but  
273 we retained them for the sake of brevity: the Miscellaneous clade was weakly supported and  
274 comprised morphologically and ecologically disparate families, while the Hadzioids were  
275 morphologically consistent but polyphyletic. The order Ingolfiellida was recovered as a sister to  
276 Amphipoda only in the IQTREE analysis. All remaining analyses (ML with RAxML, BI, and MP)  
277 recovered the order Spelaeogriphacea as a sister to amphipods with high support, while the order  
278 Ingolfiellida was sister to (Amphipoda+Speleogriphacea) clade (Figs. S3-S5).

279 Molecular dating using all the calibration points or only the root calibration resulted in similar  
280 estimations (10 to 20 Ma differences; Table S3). The calibration scheme that included only the recent  
281 ingroup fossils resulted in expectedly younger estimates, however, the 95% HPD intervals of all  
282 calibration schemes overlapped to some extent (Table S3). Altogether, these results contradict the  
283 previous views that the modern diversity of the Amphipoda was already established by the Late  
284 Palaeozoic/Early Mesozoic (Barnard & Barnard 1983; Lowry & Myers 2013). For evolutionary,  
285 ecological and biogeographical interpretation we considered the complete calibration scheme since it  
286 is the most balanced and informed. Accordingly, Amphipoda has split off from Ingolfiellida during the  
287 Permian (~281 Ma) and started radiating shortly after the Permo-Triassic mass extinction (~240 Ma).  
288 Crown ages of all major clades lie between the Early Cretaceous and Early Palaeogene (Fig. 2, Table  
289 S3). A fully annotated chronogram is available as a supplementary figure (Fig. S6). An additional tree  
290 with the geographical distribution of taxa mapped onto it is also available as supplementary  
291 information (Fig. S7).

292

293 *Diversification through time and ancestral states reconstruction*

294 The sliding window analysis identified four main pulses of diversification: the first occurred during  
295 the middle Jurassic, the second during the late Jurassic/early Cretaceous, the third during the mid-  
296 Cretaceous, and the fourth in the late Cretaceous (Fig. 2).

297 The SCM (Fig. 3) and ML (Fig. S8) reconstructions of ancestral states were highly congruent  
298 and revealed a dynamic evolution of Amphipod ecology. The analyses based on 1000 simulations  
299 suggested that all ecological changes, except the shift to semiterrestriality, happened multiple times:  
300 on average 5.7 times from free-living to symbiotic life-style, 7.4 times from marine to freshwater and  
301 2.6 times vice versa, 12.9 times from cold to warm waters and 5.3 times back to cold water, and 9.5  
302 times from benthic to pelagic habitat (Table 1). At least 100 changes of depth zones were estimated,  
303 mostly from shallow waters to deep sea (Table 1). There was a presumably single shift to  
304 semiterrestrial life from ancestors with uncertain salinity preference (Table 1, Fig. 3) (see Discussion).

305 All these ecological changes took place relatively late in the amphipod evolutionary history,  
306 no earlier than 170Ma. The periods of intense ecological disparification corresponded to peaks of  
307 lineage diversification. The ancestral amphipod was reconstructed as a cold-water, free-living, marine  
308 animal, inhabiting shallow benthos. The first ecological shifts date to middle Jurassic, when the  
309 ancestor of Hyperiid clade (Physosomatans+Physocephalatans) likely switched from cold-water and  
310 free-living benthic species to warm-water and mostly pelagic symbiont mode of life (Table 1, Figs. 3-  
311 S8). The ancestral salinity of Talitroids is uncertain because the ML analysis suggests a marine  
312 ancestry while the SCM indicates a freshwater ancestry (see Discussion for details). The next pulse of  
313 disparification took place in Late Cretaceous, when the caprellid lineage of the Corophioid clade  
314 switched from cold-water free-living animals to warm water-symbionts. At the same time, at least two  
315 transitions to freshwater occurred in Crangonyctoids and Niphargidae/Pseudoniphargidae clades.  
316 Gammaroids presumably transitioned to fresh waters at least twice during the Palaeogene. Similarly,  
317 transition to deep-sea niches (>1000 m) occurred predominantly during the Palaeogene, mainly in the  
318 Lysianassoids, the Physosomatans and several lineages of the Eusiroid/Iphimediod clade. The third  
319 pulse of ecological disparification took place during the last 50 Ma, with multiple ecological shifts all  
320 over the phylogeny (Table 1, Fig3. 3-S8).

321

## 322 **Discussion**

323 Our study reveals an ancient Permian origin of amphipods, and their delayed diversification during the  
324 Late Jurassic-Early Cretaceous followed by ecological disparification during the Cretaceous-  
325 Palaeogene. These results refute the view that most of the modern amphipod diversity already existed  
326 since the Late Palaeozoic-Early Mesozoic and help reconcile their old history with their absence in the  
327 pre-Cenozoic fossil record. Below we discuss the main global events that may have affected their  
328 diversification and ecological radiation. We focus on large-scale patterns and emphasize that although  
329 many nested radiations likely occurred discussing them in detail is beyond the scope of this study.

330

### 331 *Global evolutionary and biogeographical patterns*

332 Our results indicate that amphipods split off from ingolfiellids during the Permian (~280 Ma).  
333 This is in good agreement with previous studies which suggested a Late Palaeozoic age of the  
334 Amphipoda based on the fact that peracarids went through an extensive phase of radiation and  
335 dispersal during this time (Bousfield 1983; Schram 1986; Wolfe *et al.* 2016). Furthermore, the  
336 Permian is also known for its peak in the diversification of marine invertebrates (Alroy *et al.* 2008).  
337 Extant amphipod lineages started radiating after the major Permo-Triassic extinction, a catastrophic  
338 event that wiped out up to 95% of marine taxa (Benton & Twitchett 2003). During this dramatic  
339 extinction, the Panthalassic Ocean was largely anoxic, especially at higher latitudes or depths, and  
340 only the Palaeotethys Ocean retained suitable levels of oxygenation (Penn *et al.* 2018), where hypoxia-  
341 sensitive amphipods could survive and from where they subsequently radiated. This hypothesis is  
342 concordant with tethyan distribution of the basal, shallow-water Hadzioid lineages in our phylogeny  
343 (Barnard 1976; Stock 1993; Bauzà-Ribot *et al.* 2012).

344 Most of the deep splits in the phylogeny leading towards the extant major clades took place  
345 during the Triassic and Early Cretaceous (Fig. 2). Also, three of the four main lineage diversification  
346 peaks took place in this period. Assuming that amphipods were littoral inhabitants throughout this  
347 time-frame, it is likely that the breakup of Pangaea followed by subsequent fragmentation of the

348 resulting Laurasia and Gondwana supercontinents (Seton *et al.* 2012) played an important vicariant  
349 role, as seen in the Holarctic freshwater crangonyctoids (Copilaş-Ciocianu *et al.* 2019) or thalassoid  
350 lineages with an amphi-Atlantic distribution (Bauzà-Ribot *et al.* 2012). We consider that more detailed  
351 inferences are speculative due to the cosmopolitan distribution of many marine lineages and the lack  
352 of pre-Cenozoic fossils. Exploring this issue further requires more data and in-depth phylogenetic and  
353 biogeographical analysis of the cosmopolitan clades. Similarly, a detailed analysis of patterns of  
354 diversification rates through time was not realistic due to the extremely scarce amphipod fossil record  
355 and our incomplete dataset lacking half of the known families (Marshall 2017; Diaz *et al.* 2019).

356         The last major spike in the amphipod diversification history occurred ca. 90 Ma ago (Fig. 2).  
357 This peak of diversification could be related to the globally high sea-level stands which resulted in  
358 vast shallow epicontinental seas that provided a lot of habitat suitable for amphipods (Scotese 2014).  
359 This is particularly visible in the warm, shallow-water Corophioid, Physocephalatan and  
360 Physosomatan clades which started proliferating in this period. Furthermore, this diversification peak  
361 coincides with a peak in diversity of marine invertebrates (Alroy *et al.* 2008) and also to the highest  
362 levels of atmospheric oxygen during the last 250 Ma (Berner 2002).

363         Our estimated time-frame of overall amphipod diversification agrees well with recent  
364 molecular studies which consistently indicate a Cretaceous-Palaeogene diversification of several major  
365 clades, despite different approaches to calibrate divergence times (Hou *et al.* 2014; McInerney *et al.*  
366 2014; Corrigan *et al.* 2014; Verheye *et al.* 2017; Copilaş-Ciocianu *et al.* 2019). Therefore, these  
367 studies provide strong evidence to indicate that the diversity of extant amphipods is indeed relatively  
368 recent, despite the old Permian origin of the group.

369

### 370 *Ecological radiation*

371 Our ancestral state reconstructions suggested that ancestral amphipods were free-living, marine,  
372 littoral animals with an affinity for cold water for a large part of their evolutionary history (Permian to  
373 Late Jurassic), and are in agreement with previous hypotheses (Bousfield 1983). The littoral, which is  
374 the most oxygenated part of the ocean (Keeling *et al.* 2010) possibly acted as a long-term refugium for

375 hypoxia sensitive animals such as amphipods (Modig & Ólafsson 1998; Wiklund & Sundelin 2001;  
376 Wu & Or 2005; Vaquer-Sunyer & Duarte 2008). This would suggest that the long Permian-to-mid  
377 Mesozoic ecological stasis in littoral habitats was a result of environmental constraints, reflecting the  
378 suboptimal conditions present in non-littoral parts of the ocean, such as high global temperatures  
379 (especially in the deep sea), weak oceanic circulation, hypoxic conditions and frequent deep-sea  
380 anoxia (McClain & Hardy 2010; Mills *et al.* 2019). Considering that the coastal environment is prone  
381 to erosion rather than deposition (Wilke *et al.* 2016), our results support the view that the absence of a  
382 pre-Cenozoic amphipod fossil record (Bousfield 1978; Schram 1986) is best explained by a  
383 combination of long evolutionary confinement to active littoral habitats, small size and weakly  
384 fossilizable cuticle (Bousfield 1983).

385         The overall evidence thus indicates that the ecological radiation of amphipods proceeded from  
386 shallow marine waters. Most of the freshwater radiations emerged relatively recently (Late  
387 Cretaceous/Cenozoic) after the substantial Late Cretaceous temperature drop (Figs. 2-3)(Mills *et al.*  
388 2019). All of these freshwater clades (especially the Holarctic Crangonyctoids, Gammaroids and  
389 Niphargids) descended from shallow-water ancestors and often exhibit a peculiar biogeographic  
390 pattern with older lineages and higher phylogenetic diversity occurring in the northern part of their  
391 ranges (McInerney *et al.* 2014; Copilaş-Ciocianu *et al.* 2017, 2019). This is likely a relict pattern  
392 which reflects their more northwards pre-Pleistocene distribution, and consequently their affinity for  
393 cold water. This hypothesis is supported by amber fossils clearly belonging to the Niphargidae clade,  
394 found in the Baltic region, which lies northwards of the contemporary range of the group (Coleman &  
395 Myers 2000; Kupryjanowicz & Jazdzewski 2010). Noteworthy, the ancestral salinity preference of the  
396 Talitroid clade is uncertain in our analyses. The Bayesian reconstruction indicated a freshwater  
397 ancestry (Fig. 3) while the ML reconstruction suggested a marine ancestry (Fig. S8). These contrasting  
398 results are most likely an artefact of low sampling of marine Talitroid lineages due to limited sequence  
399 availability. Most likely the group has a marine origin (Serejo 2004) and more fine scale studies also  
400 showed a saline origin of some inland Talitrids (Yang *et al.* 2013).

401 All the colonizations of the deep-sea also took place throughout the cooling of the Late-  
402 Cretaceous/Cenozoic, and postdate the Cenomanian-Turonian oceanic anoxic event which triggered  
403 global faunal extinctions (Figs. 2-3)(80-100 Ma; Arthur *et al.* 1987). This time frame also corresponds  
404 with the opening and deepening of the North Atlantic and Southern Oceans (Seton *et al.* 2012) which  
405 are thought to have played an important role in the diversification of the Lysianassoid and  
406 Eusiroid/Iphimedioid clades (Corrigan *et al.* 2014; Verheye *et al.* 2017). These relatively recent deep-  
407 sea radiations agree well with the prevailing view that most of the deep-sea fauna is of Cenozoic  
408 origin due to the hypoxic conditions during most of the Mesozoic (Lindner *et al.* 2008; McClain &  
409 Hardy 2010; Vrijenhoek 2013; Herrera *et al.* 2015). At least for deep-sea amphipods, the tectonic-  
410 induced climatic cooling, leading to a better ventilated ocean (Donnadieu *et al.* 2016), coupled with  
411 the Cenomanian-Turonian extinction event not only dwindled the competitors but also created suitable  
412 environmental conditions for amphipods to thrive and ecologically expand. Moreover, the inverse  
413 latitudinal richness gradient observed in contemporary freshwater and marine amphipods (Barnard &  
414 Barnard 1983; Väinölä *et al.* 2008; Rivadeneira *et al.* 2011) further emphasizes that low temperature is  
415 somehow critical for the colonization of freshwater and deep-sea niches. However, we lack a precise  
416 understanding of these processes, which are probably related to the generally low tolerance of  
417 amphipods to hypoxic conditions (Modig & Ólafsson 1998; Wiklund & Sundelin 2001; Wu & Or  
418 2005; Vaquer-Sunyer & Duarte 2008).

419 Transitions to a pelagic life-style occurred numerous times as well, and are especially  
420 prevalent in deep-sea lineages (Fig. 3). In freshwater, this transition occurred only once, in the highly  
421 specialized Baikal species *Macrohectopus branickii*. Like in the previous cases, the majority of these  
422 pelagic transitions are relatively recent (Late Cretaceous to Cenozoic), mainly because these lineages  
423 occur in the deep-sea. Exceptionally, the diverse Physocephalatan clade colonized warm shallow  
424 epipelagic waters during the Early Cretaceous, earlier than all of the other pelagic lineages. Our results  
425 reveal that Hyperiid (Physocephalatan+Physosomatans) colonized pelagic niches two times  
426 independently and contradict the prevailing view of a single colonization of pelagial (Lowry & Myers  
427 2017).



428           The expansion into symbiotic niches seems to not have been influenced that much by climatic  
429 cooling. Both the large symbiotic Hyperiid clade as well as the caprellid lineage of the Corophioid  
430 clade switched to this life-style during the warm Late Jurassic/Cretaceous (Figs. 2-3). These clades are  
431 associated with an ancestral preference for warmer temperatures (Fig. 3). Therefore, it is likely that the  
432 Cretaceous high sea-level which led to the formation of numerous shallow and warm epicontinental  
433 seas (Scotese 2014) created vast amounts of suitable habitats which promoted diversification and  
434 facilitated the formation of symbiotic relationships. The crown age of the exclusively symbiotic  
435 Hyperiid clade (ca. 140 Ma) corresponds well with a peak of reef forming coral diversity at 150 Ma  
436 (Simpson *et al.* 2011), an important habitat for the basal members of this clade (Barnard & Karaman  
437 1991; Lowry & Myers 2009). These symbiotic clades often contain taxa with extreme ecological  
438 specialization, and exhibit a highly modified morphology (Fig. 1) (Laval 1980; Ito *et al.* 2011; Hurt *et*  
439 *al.* 2013).

440           The colonization of terrestrial habitats occurred only in the lineage of the family Talitridae of  
441 the Talitroid clade. Although this is possibly the most radical ecological transition among amphipods  
442 (Spicer *et al.* 1987), it is also one of the most recent, occurring during the Palaeogene (Figs. 2-3). It  
443 has been previously proposed that the terrestrial transition of talitrids was dependent on the availability  
444 of angiosperms (main food source), and thus, should not be older than the Cretaceous radiation of this  
445 group of plants (Bousfield 1983; Barba-Montoya *et al.* 2018). Nevertheless, some authors suggest a  
446 Pangaean origin of talitrids given their global distribution (Lowry & Myers 2019). Additional  
447 evidence supporting a young age for this clade is its less advanced stage of terrestrial specialization  
448 and far lower taxonomic diversity in comparison with the related oniscoidean isopods (Bousfield  
449 1983; Spicer *et al.* 1987), which have colonized this habitat at least since the Early Cretaceous,  
450 possibly even the Late Palaeozoic (Broly *et al.* 2013). The young age of the Talitridae implies that the  
451 switch to semiterrestrial life likely took place multiple times within the Talitroid lineage, a hypothesis  
452 that remains to be tested using more comprehensive taxon sampling.

453

454 *Systematic implications*

455           The main molecular clades recovered in our phylogeny correspond well in most cases with the  
456 major morphological groups (Lowry & Myers 2017). Due to some unresolved basal nodes and  
457 incomplete taxon sampling, the topology of our molecular phylogeny cannot refute the current  
458 systematic view. Although we had data on four of the six recognized suborders (Hyperioidea and  
459 Pseudoingolfiellidea were missing), our phylogeny generally supports the three main suborders,  
460 Amphilochea, Hyperioidea and Senticaudata, but suggests some reshuffling. For example, the  
461 parvorders Lysianassidira, as well as the polyphyletic Haustoriidira and Synopiidira should be placed  
462 into the Senticaudata rather than Amphilochea. Similarly, the suborder Colomastigidea along with  
463 the amphilochean families Amphilocheidae and Leucothoidae should be placed within Hyperioidea,  
464 reinforcing a previously proposed close relationship between Hyperioidea and Amphilocheidae (Kim &  
465 Kim 1993). We consider that a thorough systematic discussion is beyond the scope of this paper, and  
466 suggest that a phylogenomic approach could prove invaluable for a better understanding of amphipod  
467 evolution, as evidenced in a recent study on decapod crustaceans (Wolfe *et al.* 2019). However, any  
468 evolutionary hypothesis needs to be tested by independent lines of evidence, and, as such, we consider  
469 that phenotypic data plays a crucial role even in the modern era of phylogenomics (Lee & Palci 2015).

470

## 471 **Conclusion**

472           The Late Mesozoic is notable for its dramatic global changes which saw the rise and demise of  
473 many organismal groups, leading towards the modern biota (Scott 1995; Roelants *et al.* 2007; Alroy *et al.*  
474 *et al.* 2008; Schulte *et al.* 2010; Meredith *et al.* 2011; Barba-Montoya *et al.* 2018; Varga *et al.* 2019). In  
475 the case of the Amphipoda, these changes brought an important turning point in their evolution. The  
476 fortuitous coupling of several critical circumstances such as extinction of deep-sea competitors  
477 followed by climatic cooling, oceanic deepening and increased oxygenation, created ecological  
478 opportunities which allowed hypoxia-sensitive amphipods to overcome a long period of ecological  
479 stasis and to radiate into many new niches. Such patterns of protracted stasis followed by extensive  
480 ecological radiation due to global changes seem to be common throughout the tree of life (Mitchell &  
481 Makovicky 2014; Halliday *et al.* 2019). Our results also emphasize the importance of molecular

482 phylogenetics in illuminating the evolutionary history of highly diverse clades which have an  
483 extremely poor fossil record.

484

#### 485 **Acknowledgements**

486 We thank Dante Fenolio, David Fenwick and Alexander Semenov for kindly providing amphipod  
487 photographs. DCC was supported by the Research Council of Lithuania (09.3.3-LMT-K-712-13-  
488 0150), ŠB and CF were supported by the Slovenian Research Agency (Program P1-0184, Project N1-  
489 0069 and grant contract. KB139 382597).

490

## 491 **References**

- 492 Aberer AJ, Kobert K, Stamatakis A (2014) ExaBayes: massively parallel bayesian tree inference for  
493 the whole-genome era. *Molecular biology and evolution*, **31**, 2553–6.
- 494 Alroy J, Aberhan M, Bottjer DJ *et al.* (2008) Phanerozoic trends in the global diversity of marine  
495 invertebrates. *Science*, **321**, 97–100.
- 496 Arfianti T, Wilson S, Costello MJ (2018) Progress in the discovery of amphipod crustaceans. *PeerJ*, **6**,  
497 e5187.
- 498 Arthur MA, Schlanger SO, Jenkyns HC (1987) The Cenomanian-Turonian Oceanic Anoxic Event, II.  
499 Palaeoceanographic controls on organic-matter production and preservation. In: *Marine*  
500 *Petroleum Source Rocks* (eds Brooks J, Fleet AJ), pp. 401–420. Blackwell Scientific Publishers,  
501 Oxford.
- 502 Barba-Montoya J, dos Reis M, Schneider H, Donoghue PCJ, Yang Z (2018) Constraining uncertainty  
503 in the timescale of angiosperm evolution and the veracity of a Cretaceous Terrestrial Revolution.  
504 *New Phytologist*, **218**, 819–834.
- 505 Barnard JL (1976) Amphipoda ( Crustacea ) from the Indo-Pacific Tropics: a review. *Micronesica*, **12**,  
506 169–181.
- 507 Barnard JL, Barnard CM (1983) *Freshwater Amphipoda of the World*. Hayfield Associates, Mt.  
508 Vernon, Virginia.
- 509 Barnard JL, Karaman GS (1991) The families and genera of marine gammaridean Amphipoda (except  
510 marine gammaroids). *Records of the Australian Museum*, **13**, 1–417.
- 511 Bauzà-Ribot MM, Juan C, Nardi F *et al.* (2012) Mitogenomic phylogenetic analysis supports  
512 continental-scale vicariance in subterranean thalassoid crustaceans. *Current Biology*, **22**, 2069–  
513 2074.
- 514 Bazikalova A (1945) *Amphipods of Baikal*. USSR Academy of Sciences Publishing House, Moscow.
- 515 Benton MJ, Twitchett RJ (2003) How to kill (almost) all life: the end-Permian extinction event.  
516 *Trends in Ecology & Evolution*, **18**, 358–365.
- 517 Berge J, Boxshall G, Vader W (2000) Phylogenetic analysis of the Amphipoda, with special emphasis  
518 on the origin of the Stegocephalidae. *Polskie Archiwum Hydrobiologii*, **47**, 379–400.
- 519 Berner RA (2002) Atmospheric oxygen over Phanerozoic time. *Proceedings of the National Academy*  
520 *of Sciences*, **96**, 10955–10957.
- 521 Best RJ, Stachowicz JJ (2014) Phenotypic and phylogenetic evidence for the role of food and habitat  
522 in the assembly of communities of marine amphipods. *Ecology*, **95**, 775–786.
- 523 Bollback JP (2006) SIMMAP: Stochastic character mapping of discrete traits on phylogenies. *BMC*  
524 *Bioinformatics*, **7**, 88.
- 525 Bousfield EL (1977) A New Look at the Systematics of Gammaroidean Amphipods of the World.  
526 *Crustaceana*, **4**, 282–316.
- 527 Bousfield EL (1978) A revised classification and phylogeny of amphipod crustaceans. *Transactions of*  
528 *the Royal Society of Canada*, **16**, 343–390.
- 529 Bousfield EL (1983) An updated phyletic classification and palaeohistory of the Amphipoda. In:  
530 *Crustacean phylogeny* (ed Schram FR), pp. 257–277. Balkema, Rotterdam.
- 531 Bousfield EL, Poinar GO (1994) A new terrestrial amphipod from Tertiary amber deposits of Chiapas  
532 Province, Southern Mexico. *Historical Biology*, **7**, 105–114.
- 533 Bousfield EL, Poinar GO (1995) New terrestrial amphipod from Tertiary amber deposits of the  
534 Dominican Republic. *Journal of Crustacean Biology*, **15**, 746–755.
- 535 Broly P, Deville P, Maillet S (2013) The origin of terrestrial isopods (Crustacea: Isopoda: Oniscidea).  
536 *Evolutionary Ecology*, **27**, 461–476.
- 537 de Broyer C, Lowry JK, Jazdzewski K, Robert H (2007) Synopsis of the Amphipoda of the Southern  
538 Ocean. *Bulletin de l'Institut royal des sciences naturelles de Belgique, Biologie*, **77**, 1–325.
- 539 De Broyer C, Nyssen F, Dauby P (2004) The crustacean scavenger guild in Antarctic shelf, bathyal  
540 and abyssal communities. *Deep Sea Research Part II: Topical Studies in Oceanography*, **51**,

- 541 1733–1752.
- 542 Coleman CO (2004) Aquatic amphipods (Crustacea: Amphipoda: Crangonyctidae) in three pieces of  
543 Baltic amber. *Organisms Diversity and Evolution*, **4**, 119–122.
- 544 Coleman CO (2006) An amphipod of the genus *Synurella* Wrzesniowski, 1877 (Crustacea,  
545 Amphipoda, Crangonyctidae) found in Baltic amber. *Organisms Diversity and Evolution*, **6**,  
546 103–108.
- 547 Coleman CO, Myers AA (2000) New Amphipoda from Baltic amber. *Polish Archives of*  
548 *Hydrobiology*, **47**, 457–464.
- 549 Condamine FL, Rolland J, Morlon H (2013) Macroevolutionary perspectives to environmental change.  
550 *Ecology Letters*, **16**, 72–85.
- 551 Copilaş-Ciocianu D, Fişer C, Borza P, Petrusek A (2018) Is subterranean lifestyle reversible?  
552 Independent and recent large-scale dispersal into surface waters by two species of the  
553 groundwater amphipod genus *Niphargus*. *Molecular Phylogenetics and Evolution*, **119**, 37–49.
- 554 Copilaş-Ciocianu D, Petrusek A (2017) Phylogeography of a freshwater crustacean species complex  
555 reflects a long-gone archipelago. *Journal of Biogeography*, **44**, 421–432.
- 556 Copilaş-Ciocianu D, Rutová T, Pařil P, Petrusek A (2017) Epigeal gammarids survived millions of  
557 years of severe climatic fluctuations in high latitude refugia throughout the Western Carpathians.  
558 *Molecular Phylogenetics and Evolution*, **112**, 218–229.
- 559 Copilaş-Ciocianu D, Sidorov DA, Gontcharov AA (2019) Adrift across tectonic plates: molecular  
560 phylogenetics supports the ancient Laurasian origin of old limnic crangonyctid amphipods.  
561 *Organisms Diversity & Evolution*, **19**, 191–207.
- 562 Corrigan LJ, Horton T, Fotherby H, White TA, Hoelzel AR (2014) Adaptive Evolution of Deep-Sea  
563 Amphipods from the Superfamily Lysiassanoidea in the North Atlantic. *Evolutionary Biology*,  
564 **41**, 154–165.
- 565 Dangles O, Malmqvist B (2004) Species richness-decomposition relationships depend on species  
566 dominance. *Ecology Letters*, **7**, 395–402.
- 567 Derzhavin AN (1927) Notes on the Upper Sarmatian Amphipods of the Ponto-Caspian region. *Bulletin*  
568 *de la Societe des Naturalistes de Moscou*, **2**, 183–196.
- 569 Diaz FLH, Harmon LJ, Sugawara MTC, Eliot TM, Pennell MW (2019) Macroevolutionary  
570 diversification rates show time-dependency. *Proceedings of the National Academy of Sciences of*  
571 *the United States of America*, **116**, 7403–7408.
- 572 Donnadieu Y, Puc at E, Moiroud M, Guillocheau F, Deconinck J-F (2016) A better-ventilated ocean  
573 triggered by Late Cretaceous changes in continental configuration. *Nature Communications*, **7**,  
574 10316.
- 575 Drummond AJ, Suchard MA, Xie D, Rambaut A (2012) Bayesian phylogenetics with BEAUti and the  
576 BEAST 1.7. *Molecular Biology and Evolution*, **29**, 1969–1973.
- 577 Duch ene S, Lanfear R, Ho SYW (2014) The impact of calibration and clock-model choice on  
578 molecular estimates of divergence times. *Molecular Phylogenetics and Evolution*, **78**, 277–289.
- 579 Duffy JE, Hay ME (2000) Strong impacts of grazing amphipods on the organization of a benthic  
580 community. *Ecological Monographs*, **70**, 237–263.
- 581 Edgar RC (2004) MUSCLE: Multiple sequence alignment with high accuracy and high throughput.  
582 *Nucleic Acids Research*, **32**, 1792–1797.
- 583 Esmaili-Rineh S, Sari A, Delic T, Mořkriř A, Fişer C (2015) Molecular phylogeny of the  
584 subterranean genus *Niphargus* (Crustacea: Amphipoda) in the Middle East: A comparison with  
585 European Niphargids. *Zoological Journal of the Linnean Society*, **175**, 812–826.
- 586 Finston TL, Johnson MS, Humphreys WF, Eberhard SM, Halse SA (2007) Cryptic speciation in two  
587 widespread subterranean amphipod genera reflects historical drainage patterns in an ancient  
588 landscape. *Molecular Ecology*, **16**, 355–365.
- 589 Fişer C (2012) *Niphargus*: a model system for evolution and ecology. In: *Encyclopedia of caves* (eds  
590 Culver DC, White WB), pp. 555–564. Academic Press, New York.
- 591 Fişer C, Robinson CT, Malard F (2018) Cryptic species as a window into the paradigm shift of the  
592 species concept. *Molecular Ecology*, **27**, 613–635.
- 593 Gonz alez AR, Guerra-Garc a JM, Maestre MJ *et al.* (2008) Community structure of caprellids

- 594 (Crustacea: Amphipoda: Caprellidae) on seagrasses from southern Spain. *Helgoland Marine*  
595 *Research*, **62**, 189–199.
- 596 Guindon S, Dufayard JF, Lefort V *et al.* (2010) New algorithms and methods to estimate maximum-  
597 likelihood phylogenies: Assessing the performance of PhyML 3.0. *Systematic Biology*, **59**, 307–  
598 321.
- 599 Halliday TJD, Dos Reis M, Tamuri AU *et al.* (2019) Rapid morphological evolution in placental  
600 mammals post-dates the origin of the crown group. *Proceedings of the Royal Society B:*  
601 *Biological Sciences*, **286**, 20182418.
- 602 Hannisdal B, Peters SE (2011) Phanerozoic Earth System Evolution and Marine Biodiversity. *Science*,  
603 **334**, 1121–1124.
- 604 Havermans C, Nagy ZT, Sonet G, De Broyer C, Martin P (2010) Incongruence between molecular  
605 phylogeny and morphological classification in amphipod crustaceans: A case study of Antarctic  
606 lysianassoids. *Molecular Phylogenetics and Evolution*, **55**, 202–209.
- 607 Havermans C, Smetacek V (2018) Bottom-up and top-down triggers of diversification: A new look at  
608 the evolutionary ecology of scavenging amphipods in the deep sea. *Progress in Oceanography*,  
609 **164**, 37–51.
- 610 Heath TA, Hedtke SM, Hillis DM (2008) Taxon sampling and the accuracy of phylogenetic analyses.  
611 *Journal of Systematics and Evolution*, **46**, 239–257.
- 612 Herrera S, Watanabe H, Shank TM (2015) Evolutionary and biogeographical patterns of barnacles  
613 from deep-sea hydrothermal vents. *Molecular Ecology*, **24**, 673–689.
- 614 Ho SYW, Phillips MJ (2009) Accounting for calibration uncertainty in phylogenetic estimation of  
615 evolutionary divergence times. *Systematic Biology*, **58**, 367–380.
- 616 Hoang DT, Chernomor O, von Haeseler A, Minh BQ, Vinh LS (2018) UFBoot2: Improving the  
617 Ultrafast Bootstrap Approximation. *Molecular Biology and Evolution*, **35**, 518–522.
- 618 Horton T, Lowry J, De Broyer C *et al.* (2019) World Amphipoda Database. Accessed at  
619 <http://www.marinespecies.org/amphipoda> on 2019-03-29.
- 620 Hou Z, Sket B (2016) A review of Gammaridae (Crustacea: Amphipoda): The family extent, its  
621 evolutionary history, and taxonomic redefinition of genera. *Zoological Journal of the Linnean*  
622 *Society*, **176**, 323–348.
- 623 Hou Z, Sket B, Fiser C, Li S (2011) Eocene habitat shift from saline to freshwater promoted Tethyan  
624 amphipod diversification. *Proceedings of the National Academy of Sciences of the United States*  
625 *of America*, **108**, 14533–14538.
- 626 Hou Z, Sket B, Li S (2014) Phylogenetic analyses of Gammaridae crustacean reveal different  
627 diversification patterns among sister lineages in the Tethyan region. *Cladistics*, **30**, 352–365.
- 628 Hurt C, Haddock SHD, Browne WE (2013) Molecular phylogenetic evidence for the reorganization of  
629 the Hyperiid amphipods, a diverse group of pelagic crustaceans. *Molecular Phylogenetics and*  
630 *Evolution*, **67**, 28–37.
- 631 Ito A, Aoki MN, Yahata K, Wada H (2011) Complicated evolution of the caprellid (Crustacea:  
632 Malacostraca: Peracarida: Amphipoda) body plan, reacquisition or multiple losses of the thoracic  
633 limbs and pleons. *Development Genes and Evolution*, **221**, 133–140.
- 634 Jacobs DK, Lindberg DR (2002) Oxygen and evolutionary patterns in the sea: Onshore/offshore trends  
635 and recent recruitment of deep-sea faunas. *Proceedings of the National Academy of Sciences*, **95**,  
636 9396–9401.
- 637 Kao D, Lai AG, Stamatakis E *et al.* (2016) The genome of the crustacean *Parhyale hawaiiensis*, a  
638 model for animal development, regeneration, immunity and lignocellulose digestion. *eLife*, **5**,  
639 e20062.
- 640 Katoh K, Kuma K, Toh H, Miyata T (2005) MAFFT version 5: improvement in accuracy of multiple  
641 sequence alignment. *Nucleic Acids Research*, **33**, 511–518.
- 642 Keeling RF, Körtzinger A, Gruber N (2010) Ocean Deoxygenation in a Warming World. *Annual*  
643 *Review of Marine Science*, **2**, 199–229.
- 644 Kim CB, Kim W (1993) Phylogenetic relationships among gammaridean families and amphipod  
645 suborders. *Journal of Natural History*, **27**, 933–946.
- 646 Kupryjanowicz J, Jażdżewski K (2010) One More Fossil Niphargid (Malacostraca: Amphipoda) from

- 647 Baltic Amber. *Journal of Crustacean Biology*, **30**, 413–416.
- 648 Lanfear R, Frandsen PB, Wright AM, Senfeld T, Calcott B (2017) Partitionfinder 2: New methods for  
649 selecting partitioned models of evolution for molecular and morphological phylogenetic  
650 analyses. *Molecular Biology and Evolution*, **34**, 772–773.
- 651 Laval P (1980) Hyperiid amphipods as crustacean parasitoids associated with gelatinous zooplankton.  
652 *Oceanography and Marine Biology - An Annual Review*, **18**, 11–56.
- 653 Lear CH, Elderfield H, Wilson PA (2000) Cenozoic deep-sea temperatures and global ice volumes  
654 from Mg/Ca in benthic foraminiferal calcite. *Science*, **287**, 269–272.
- 655 Lee MSY, Palci A (2015) Morphological phylogenetics in the genomic age. *Current Biology*, **25**,  
656 R922–R929.
- 657 Lindner A, Cairns SD, Cunningham CW (2008) From offshore to onshore: Multiple origins of  
658 shallow-water corals from deep-sea ancestors. *PLoS ONE*, **3**, e2429.
- 659 Liu K, Warnow T (2014) Large-scale multiple sequence alignment and tree estimation using SATé.  
660 *Methods in molecular biology*, **1079**, 219–44.
- 661 Liu K, Warnow TJ, Holder MT *et al.* (2012) SATé-II: Very Fast and Accurate Simultaneous  
662 Estimation of Multiple Sequence Alignments and Phylogenetic Trees. *Systematic Biology*, **61**,  
663 90.
- 664 Lowry JK, Myers AA (2009) Benthic Amphipoda (Crustacea: Peracarida) of the Great Barrier Reef  
665 (JK Lowry, AA Myers, Eds.). *Zootaxa*, **2260**, 1–930.
- 666 Lowry JK, Myers AA (2013) A Phylogeny and Classification of the Senticaudata subord. nov.  
667 (Crustacea: Amphipoda). *Zootaxa*, **3610**, 1–80.
- 668 Lowry JK, Myers AA (2017) A Phylogeny and Classification of the Amphipoda with the  
669 establishment of the new order Ingolfiellida (Crustacea: Peracarida). *Zootaxa*, **4265**, 1–89.
- 670 Lowry JK, Myers AA (2019) New genera of Talitridae in the revised Superfamily Talitroidea  
671 Bulycheva 1957 (Crustacea, Amphipoda, Senticaudata). *Zootaxa*, **4553**, 1–100.
- 672 Macdonald KS, Yampolsky L, Duffy JE (2005) Molecular and morphological evolution of the  
673 amphipod radiation of Lake Baikal. *Molecular Phylogenetics and Evolution*, **35**, 323–343.
- 674 Machado GBO, Ferreira AP, Bueno M, Siqueira SGL, Leite FPP (2019) Effects of macroalgal host  
675 identity and predation on an amphipod assemblage from a subtropical rocky shore.  
676 *Hydrobiologia*.
- 677 Mamos T, Wattier R, Burzynski A, Grabowski M (2016) The legacy of a vanished sea: A high level of  
678 diversification within a European freshwater amphipod species complex driven by 15 My of  
679 Paratethys regression. *Molecular Ecology*, **25**, 795–810.
- 680 Marshall CR (2008) A simple method for bracketing absolute divergence times on molecular  
681 phylogenies using multiple fossil calibration points. *The American Naturalist*, **171**, 726–742.
- 682 Marshall CR (2017) Five palaeobiological laws needed to understand the evolution of the living biota.  
683 *Nature Ecology and Evolution*, **1**, 0165.
- 684 McClain CR, Hardy SM (2010) The dynamics of biogeographic ranges in the deep sea. *Proceedings of  
685 the Royal Society B: Biological Sciences*, **277**, 3533–3546.
- 686 McInerney CE, Maurice L, Robertson AL *et al.* (2014) The ancient Britons: Groundwater fauna  
687 survived extreme climate change over tens of millions of years across NW Europe. *Molecular  
688 Ecology*, **23**, 1153–1166.
- 689 Meredith RW, Janecka JE, Gatesy J *et al.* (2011) Impacts of the Cretaceous Terrestrial Revolution and  
690 KPg Extinction on Mammal Diversification. *Science*, **334**, 521–524.
- 691 Miller KG, Kominz MA, Browning J V. *et al.* (2005) The Phanerozoic record of global sea-level  
692 change. *Science*, **310**, 1293–1298.
- 693 Miller MA, Pfeiffer W, Schwartz T (2010) Creating the CIPRES Science Gateway for inference of  
694 large phylogenetic trees. In: *Proceedings of the Gateway Computing Environments Workshop  
695 (GCE)*, pp. 1–8. New Orleans, Louisiana.
- 696 Mills BJW, Krause AJ, Scotese CR *et al.* (2019) Modelling the long-term carbon cycle, atmospheric  
697 CO<sub>2</sub>, and Earth surface temperature from late Neoproterozoic to present day. *Gondwana  
698 Research*, **67**, 172–186.
- 699 Mirarab S, Nguyen N, Guo S *et al.* (2015) PASTA: Ultra-Large Multiple Sequence Alignment for

- 700 Nucleotide and Amino-Acid Sequences. *Journal of Computational biology*, **22**, 377–386.
- 701 Mitchell JS, Makovicky PJ (2014) Low ecological disparity in Early Cretaceous birds. *Proceedings of*  
702 *the Royal Society B: Biological Sciences*, **281**, 20140608.
- 703 Modig H, Ólafsson E (1998) Responses of Baltic benthic invertebrates to hypoxic events. *Journal of*  
704 *Experimental Marine Biology and Ecology*, **229**, 133–148.
- 705 Naumenko SA, Logacheva MD, Popova N V. *et al.* (2017) Transcriptome-based phylogeny of  
706 endemic Lake Baikal amphipod species flock: fast speciation accompanied by frequent episodes  
707 of positive selection. *Molecular Ecology*, **26**, 536–553.
- 708 Nguyen L-T, Schmidt HA, von Haeseler A, Minh BQ (2015) IQ-TREE: A Fast and Effective  
709 Stochastic Algorithm for Estimating Maximum-Likelihood Phylogenies. *Molecular Biology and*  
710 *Evolution*, **32**, 268–274.
- 711 Oliver JS, Oakden JM, Slattery PN (1982) Phoxocephalid Amphipod Crustaceans as Predators on  
712 Larvae and Juveniles in Marine Soft-Bottom Communities. *Marine Ecology-Progress Series*, **7**,  
713 179-184,.
- 714 Penn JL, Deutsch C, Payne JL, Sperling EA (2018) Temperature-dependent hypoxia explains  
715 biogeography and severity of end-Permian marine mass extinction. *Science*, **362**, eaat1327.
- 716 Piscart C, Navel S, Maazouzi C *et al.* (2011) Leaf litter recycling in benthic and hyporheic layers in  
717 agricultural streams with different types of land use. *Science of the Total Environment*, **409**,  
718 4373–4380.
- 719 Plazzi F, Ferrucci RR, Passamonti M (2010) Phylogenetic representativeness: a new method for  
720 evaluating taxon sampling in evolutionary studies. *BMC Bioinformatics*, **11**, 209.
- 721 Price MN, Dehal PS, Arkin AP (2010) FastTree 2 – Approximately Maximum-Likelihood Trees for  
722 Large Alignments (AFY Poon, Ed.). *PLoS ONE*, **5**, e9490.
- 723 R Core Team (2018) R: A language and environment for statistical computing. R Foundation for  
724 Statistical Computing. Available at: [www.r-project.org](http://www.r-project.org).
- 725 Rambaut A, Suchard M, Xie D, Drummond AJ (2014) Tracer v1.6.
- 726 Revell LJ (2012) phytools: an R package for phylogenetic comparative biology (and other things).  
727 *Methods in Ecology and Evolution*, **3**, 217–223.
- 728 Rivadeneira MM, Thiel M, González ER, Haye PA (2011) An inverse latitudinal gradient of diversity  
729 of peracarid crustaceans along the Pacific Coast of South America: out of the deep south. *Global*  
730 *Ecology and Biogeography*, **20**, 437–448.
- 731 Roelants K, Gower DJ, Wilkinson M *et al.* (2007) Global patterns of diversification in the history of  
732 modern amphibians. *Proceedings of the National Academy of Sciences of the United States of*  
733 *America*, **104**, 887–892.
- 734 Schram FR (1986) *Crustacea*. Oxford University Press, New York.
- 735 Schram FR, Feldmann RM, Copeland MJ (1978) The Late Devonian Palaeopalaemonidae and the  
736 Earliest Decapod Crustaceans. *Journal of Paleontology*, **52**, 1375–1387.
- 737 Schulte P, Melosh J, Bown PR *et al.* (2010) The Chicxulub Asteroid Impact and Mass Extinction at  
738 the Cretaceous–Paleogene Boundary. *Science*, **327**, 1214–1218.
- 739 Scotese CR (2014) *Atlas of Late Cretaceous Paleogeographic Maps, PALEOMAP Atlas for ArcGIS.*  
740 *The Cretaceous, maps 16-22.* PALEOMAP Project, Evanston, IL.
- 741 Scott RW (1995) Global environmental controls on Cretaceous reefal ecosystems. *Palaeogeography,*  
742 *Palaeoclimatology, Palaeoecology*, **119**, 187–199.
- 743 Serejo CS (2004) *Cladistic revision of talitroidean amphipods (Crustacea, Gammaridea), with a*  
744 *proposal of a new classification.*
- 745 Seton M, Müller RD, Zahirovic S *et al.* (2012) Global continental and ocean basin reconstructions  
746 since 200Ma. *Earth-Science Reviews*, **113**, 212–270.
- 747 Shimodaira H, Hasegawa M (1999) Multiple Comparisons of Log-Likelihoods with Applications to  
748 Phylogenetic Inference. *Molecular Biology and Evolution*, **16**, 1114–1116.
- 749 Simpson C, Kiessling W, Mewis H, Baron-Szabo RC, Müller J (2011) Evolutionary diversification of  
750 reef corals: A comparison of the molecular and fossil records. *Evolution*, **65**, 3274–3284.
- 751 Soubrier J, Steel M, Lee MSY *et al.* (2012) The Influence of Rate Heterogeneity among Sites on the  
752 Time Dependence of Molecular Rates. *Molecular Biology and Evolution*, **29**, 3345–3358.



- 753 Spicer JJ, Moore PG, Taylor AC (1987) The physiological ecology of land invasion by the Talitridae  
754 (Crustacea: Amphipoda). *Proceedings of the Royal Society of London. Series B. Biological*  
755 *Sciences*, **232**, 95–124.
- 756 Stamatakis A (2014) RAxML version 8: A tool for phylogenetic analysis and post-analysis of large  
757 phylogenies. *Bioinformatics*, **30**, 1312–1313.
- 758 Stock JH (1993) Some remarkable distribution patterns in stygobiont amphipoda. *Journal of Natural*  
759 *History*, **27**, 807–819.
- 760 Swofford DL (2002) *Phylogenetic Analysis Using Parsimony (\*and other methods)*, version 4.0b10.  
761 Sinauer Associates, Sunderland, MA.
- 762 Talavera G, Castresana J (2007) Improvement of phylogenies after removing divergent and  
763 ambiguously aligned blocks from protein sequence alignments. *Systematic Biology*, **56**, 564–577.
- 764 Tamura K, Stecher G, Peterson D, Filipiński A, Kumar S (2013) MEGA6: Molecular evolutionary  
765 genetics analysis version 6.0. *Molecular Biology and Evolution*, **30**, 2725–2729.
- 766 Thiel M (1999) Duration of extended parental care in marine amphipods. *Journal of Crustacean*  
767 *Biology*, **19**, 60–71.
- 768 Vaidya G, Lohman DJ, Meier R (2011) SequenceMatrix: Concatenation software for the fast assembly  
769 of multi-gene datasets with character set and codon information. *Cladistics*, **27**, 171–180.
- 770 Väinölä R, Witt JDS, Grabowski M *et al.* (2008) Global diversity of amphipods (Amphipoda;  
771 Crustacea) in freshwater. *Hydrobiologia*, **595**, 241–255.
- 772 Vaquer-Sunyer R, Duarte CM (2008) Thresholds of hypoxia for marine biodiversity. *Proceedings of*  
773 *the National Academy of Sciences*, **105**, 15452–15457.
- 774 Varga T, Krizsán K, Földi C *et al.* (2019) Megaphylogeny resolves global patterns of mushroom  
775 evolution. *Nature Ecology & Evolution*, **3**, 668–678.
- 776 Verheye ML, Bäckeljau T, d’Udekem d’Acoz C (2017) Locked in the icehouse: Evolution of an  
777 endemic *Epimeria* (Amphipoda, Crustacea) species flock on the Antarctic shelf. *Molecular*  
778 *Phylogenetics and Evolution*, **114**, 14–33.
- 779 Verheye ML, Martin P, Bäckeljau T, D’Udekem D’Acoz C (2016) DNA analyses reveal abundant  
780 homoplasy in taxonomically important morphological characters of Eusiroidea (Crustacea,  
781 Amphipoda). *Zoologica Scripta*, **45**, 300–321.
- 782 Vinogradov ME, Volkov AF, Semenova TN (1996) *Hyperiid amphipods (Amphipoda, Hyperiidea) of*  
783 *the world oceans* (D Siegel-Causey, Ed.). Smithsonian Institution Libraries, Washington, D.C.
- 784 Vrijenhoek RC (2013) On the instability and evolutionary age of deep-sea chemosynthetic  
785 communities. *Deep-Sea Research Part II: Topical Studies in Oceanography*, **92**, 189–200.
- 786 Weston DP, Poynton HC, Wellborn GA *et al.* (2013) Multiple origins of pyrethroid insecticide  
787 resistance across the species complex of a nontarget aquatic crustacean, *Hyaella azteca*.  
788 *Proceedings of the National Academy of Sciences*, **110**, 16532–16537.
- 789 Wheeler TJ, Kececioglu JD (2007) Multiple alignment by aligning alignments. *Bioinformatics*, **23**,  
790 559–568.
- 791 Wiklund AKE, Sundelin B (2001) Impaired reproduction in the amphipods *Monoporeia affinis* and  
792 *Pontoporeia femorata* as a result of moderate hypoxia and increased temperature. *Marine*  
793 *Ecology Progress Series*, **222**, 131–141.
- 794 Wilke T, Wagner B, Van Bocxlaer B *et al.* (2016) Scientific drilling projects in ancient lakes:  
795 Integrating geological and biological histories. *Global and Planetary Change*, **143**, 118–151.
- 796 Wolfe JM, Breinholt JW, Crandall KA *et al.* (2019) A phylogenomic framework, evolutionary  
797 timeline, and genomic resources for comparative studies of decapod crustaceans. *Proceedings of*  
798 *the Royal Society B: Biological Sciences*, **286**, 20190079.
- 799 Wolfe JM, Daley AC, Legg DA, Edgecombe GD (2016) Fossil calibrations for the arthropod Tree of  
800 Life. *Earth-Science Reviews*, **160**, 43–110.
- 801 Wu RSS, Or YY (2005) Bioenergetics, growth and reproduction of amphipods are affected by  
802 moderately low oxygen regimes. *Marine Ecology Progress Series*, **297**, 215–223.
- 803 Xia X, Xie Z (2003) DAMBE: Software Package for Data Analysis in Molecular Biology and  
804 Evolution. *Journal of Heredity*, **92**, 371–373.
- 805 Xia X, Xie Z, Salemi M, Chen L, Wang Y (2003) An index of substitution saturation and its

- 806 application. *Molecular Phylogenetics and Evolution*, **26**, 1–7.  
807 Yang Z (1995) A space-time process model for the evolution of DNA sequences. *Genetics*, **139**, 993–  
808 1005.  
809 Yang L, Hou Z, Li S (2013) Marine incursion into East Asia: a forgotten driving force of biodiversity.  
810 *Proceedings of the Royal Society B: Biological Sciences*, **280**, 20122892.  
811 Yang Z, Kumar S, Nei M (1995) A new method of inference of ancestral nucleotide and amino acid  
812 sequences. *Genetics*, **141**, 1641–1650.

813

#### 814 **Data accessibility**

815 Trees and alignments will be available at FigShare and Treebase.

816

#### 817 **Author contributions**

818 DCC, CF and SB conceived the study, DCC collected data, performed phylogenetic and molecular  
819 dating analyses, SB performed ancestral state reconstructions and diversification analyses, DCC lead  
820 the writing, all authors contributed to and approved the final version of the manuscript.

821

822 Table 1: Average number of transitions (first column) and average number of transitions per time bin,  
 823 from 1000 trees with mapped discrete character states. Cells with average changes  $\geq 0.5$  per time bin  
 824 or average total change  $\geq 1$  are highlighted and maximum values per transition are bolded.

825

| Time bins                    | Mean        | Trias. | Jurassic |            | Cretaceous |            |            | Paleogene  |            | Neo.       |
|------------------------------|-------------|--------|----------|------------|------------|------------|------------|------------|------------|------------|
|                              |             | >200   | 200-170  | 170-140    | 140-110    | 110-80     | 80-60      | 60-40      | 40-20      | 20-0       |
| <b>MODE OF LIFE</b>          |             |        |          |            |            |            |            |            |            |            |
| free - symbiont              | <b>5.9</b>  | 0      | 0        | <b>1</b>   | 0.1        | <b>0.9</b> | 0.3        | <b>0.5</b> | <b>0.6</b> | <b>2.6</b> |
| symbiont - free              | 0.2         | 0      | 0        | 0          | 0          | 0          | 0          | 0          | 0          | 0          |
| <b>HABITAT</b>               |             |        |          |            |            |            |            |            |            |            |
| freshwater - marine          | <b>2.6</b>  | 0      | 0        | 0          | 0          | 0          | 0          | 0.2        | <b>1.5</b> | <b>0.8</b> |
| freshwater - semiterrestrial | <b>1</b>    | 0      | 0        | 0          | 0          | 0          | 0          | <b>0.5</b> | <b>0.5</b> | 0          |
| marine - freshwater          | <b>7.4</b>  | 0      | 0.4      | 0.3        | 0.2        | <b>0.9</b> | <b>1.8</b> | <b>1.3</b> | <b>1.8</b> | <b>0.6</b> |
| marine - semiterrestrial     | 0           | 0      | 0        | 0          | 0          | 0          | 0          | 0          | 0          | 0          |
| semiterrestrial - freshwater | 0           | 0      | 0        | 0          | 0          | 0          | 0          | 0          | 0          | 0          |
| semiterrestrial - marine     | 0           | 0      | 0        | 0          | 0          | 0          | 0          | 0          | 0          | 0          |
| benthic - pelagic            | <b>9.5</b>  | 0      | 0        | 0.2        | 1          | <b>0.7</b> | <b>0.5</b> | <b>1</b>   | <b>3.1</b> | <b>3.1</b> |
| pelagic - benthic            | 0.7         | 0      | 0        | 0          | 0.1        | 0.2        | 0.1        | 0.1        | 0.1        | 0.2        |
| <b>TEMPERATURE</b>           |             |        |          |            |            |            |            |            |            |            |
| cold - warm                  | <b>12.9</b> | 0.1    | 0.1      | 1          | <b>0.7</b> | <b>0.8</b> | <b>1.3</b> | <b>1.6</b> | <b>3.1</b> | <b>4.2</b> |
| warm - cold                  | <b>5.3</b>  | 0.1    | 0        | 0.1        | 0.1        | 0.4        | <b>0.9</b> | <b>1</b>   | 1.2        | <b>1.5</b> |
| <b>DEPTH</b>                 |             |        |          |            |            |            |            |            |            |            |
| [<0.2 km] - [0.2-1 km]       | <b>35.5</b> | 0.3    | 0.4      | <b>0.9</b> | <b>1.9</b> | <b>3.4</b> | <b>4.5</b> | <b>5.6</b> | <b>7.4</b> | <b>11</b>  |
| [<0.2 km] - [1-4 km]         | <b>5</b>    | 0      | 0        | 0.1        | 0.2        | 0.4        | <b>1.1</b> | <b>1</b>   | <b>0.9</b> | <b>1.3</b> |
| [<0.2 km] - [>4 km]          | 0           | 0      | 0        | 0          | 0          | 0          | 0          | 0          | 0          | 0          |
| [0.2-1 km] - [1-4 km]        | <b>19.6</b> | 0.1    | 0.1      | 0.1        | <b>0.5</b> | <b>1.4</b> | <b>2.7</b> | <b>3.7</b> | <b>4.5</b> | <b>6.5</b> |
| [0.2-1 km] - [>4 km]         | <b>1.5</b>  | 0      | 0        | 0          | 0          | 0          | 0.2        | 0.2        | 0.2        | <b>0.9</b> |
| [1-4 km] - [>4 km]           | <b>5.5</b>  | 0      | 0        | 0          | 0          | 0          | 0.1        | 0.4        | <b>1.9</b> | <b>2.9</b> |
| [0.2-1 km] - [<0.2 km]       | <b>19.1</b> | 0.2    | 0.2      | 0.4        | <b>0.8</b> | <b>1.6</b> | <b>2.4</b> | <b>3.4</b> | <b>4.4</b> | <b>5.8</b> |
| [1-4 km] - [<0.2 km]         | <b>1.7</b>  | 0      | 0        | 0          | 0          | 0.1        | 0.1        | 0.3        | <b>0.5</b> | <b>0.7</b> |
| [1-4 km] - [0.2-1 km]        | <b>12.5</b> | 0      | 0        | 0.1        | 0.2        | <b>0.6</b> | <b>0.8</b> | <b>2</b>   | <b>3.2</b> | <b>5.6</b> |
| [>4 km] - [0.2-1 km]         | <b>1.2</b>  | 0      | 0        | 0          | 0          | 0          | 0          | 0          | 0          | <b>1.1</b> |
| [>4 km] - [1-4 km]           | <b>1</b>    | 0      | 0        | 0          | 0          | 0          | 0          | 0.1        | 0.3        | <b>0.5</b> |
| [>4 km] - [<0.2 km]          | 0           | 0      | 0        | 0          | 0          | 0          | 0          | 0          | 0          | 0          |

826

827

828

829

830 Fig. 1 Maximum likelihood phylogram obtained from the concatenated dataset (COI, H3, 28S and  
831 18S) using IQTREE. Nodes receiving strong support in all analyses are indicated with green circles,  
832 while nodes that received strong support in all analyses except parsimony are indicated with purple  
833 circles. Bars indicate the strength of the support that each node received in each analysis. Nodes that  
834 were weakly supported in all analyses are not annotated. Families are indicated with coloured font.  
835 Photographs on the right indicate the extent of morphological diversity of the Amphipoda.  
836 Photographs: Denis Copilas Ciocianu: a) *Dikerogammarus villosus*, b) *Chaetogammarus*  
837 *warpachowskyi*, d) *Gammarus roeselii*, h) *Niphargus pannonicus*; Dante Fenolio (used with author's  
838 permission, photos available at [www.anotheca.com/photograph](http://www.anotheca.com/photograph)): n) *Stygobromus* sp., z) *Cystisoma*  
839 sp., a') *Phronima* sp., b') *Streetsia* sp., c') *Scypholanceola* sp., d') *Scina* sp.; David Fenwick (used  
840 with author's permission, photos available at [www.aphotomarine.com](http://www.aphotomarine.com)): m) *Lysianassa ceratina*, p)  
841 *Caprella tuberculata*, q) *Corophium volutator*, u) *Pontocrates arenarius*, g') *Orchestia gammarellus*,  
842 h') *Melita hergensis*, j') *Ingolfiella britannica*; Hans Hillewaert (licensed under Creative Commons,  
843 photos available at [www.flickr.com/photos/bathyporeia/albums/72157639365477036](http://www.flickr.com/photos/bathyporeia/albums/72157639365477036)): c) *Bathyporeia*  
844 *pilosa*, e) *Ampelisca brevicornis*, f) *Stenothoe marina*, i) *Lepidepecreum longicorne*, j) *Urothoe*  
845 *brevicornis*, o) *Cyamus boopis*, s) *Megaluropus agilis*, f') *Leucothoe incise*, i') *Nototropis*  
846 *swammerdamei*, v) *Iphimedia nexa*; Russ Hopcroft (licensed under Creative Commons, photo  
847 available at <https://en.wikipedia.org>): y) *Eusirus holmi*; Joanna Legeżyńska (licensed under Creative  
848 Commons, photo available at [www.marinespecies.org](http://www.marinespecies.org)): g) *Stegocephalus inflatus*; Gustav Paulay  
849 (licensed under Creative Commons, photo available at <https://calphotos.berkeley.edu/>): e') *Colomastix*  
850 sp.; Martin Rauschert (licensed under Creative Commons, photo available at [www.marinespecies.org](http://www.marinespecies.org)):  
851 r) *Paraceradocus* sp.; Alexander Semenov (used with author's permission, photos available at  
852 [www.coldwater.science](http://www.coldwater.science)): k) *Aristias timidus*, l) *Gammarellus homari*, t) *Acanthonotozoma* sp., x)  
853 *Pleustes panopla*; Cédric d'Udekem d'Acoz (licensed under Creative Commons, photo available at  
854 [www.marinespecies.org](http://www.marinespecies.org)): w) *Epimeria oxycarinata*;

855

856 Fig. 2 Evolutionary timescale of the amphipod radiation. The time-calibrated phylogeny was obtained  
857 with BEAST using the concatenated dataset (COI, H3, 28S and 18S). Circles at nodes indicate  
858 posterior probabilities (black  $\geq 0.95$ , grey  $\geq 0.9$ , white  $\geq 0.8$ , not shown if  $< 0.8$ ) and blue bars indicate  
859 the 95% HPD intervals of clade age (shown only for main and/or strongly supported nodes). Red bars  
860 accompanied by numbers indicate node ages that were constrained using fossils. The fully annotated  
861 chronogram can be found in the supplementary information (Fig. S6). Coloured boxes on the right  
862 summarize the ecological traits of each terminal in the tree (see legend in the top left) and bars indicate  
863 depth ranges. The line graphs below the phylogeny indicate (from top to bottom) the amphipod  
864 diversification rate through time, the evolution of Cenozoic deep-sea bottom temperature (Lear *et al.*  
865 2000), the evolution of Phanerozoic surface temperature (Mills *et al.* 2019), the evolution of  
866 Phanerozoic invertebrate diversity (Alroy *et al.* 2008), and the evolution of the global Mesozoic-  
867 Cenozoic sea level (Miller *et al.* 2005). The gradient between turquoise and white colours indicates the  
868 transitions between thermohaline (two-layered ocean) and thermospheric (weakly stratified)  
869 circulation (McClain & Hardy 2010).

870

871 Fig. 3 Ecological transitions of Amphipoda through time. Ancestral state reconstruction was estimated  
872 using stochastic character mapping. Pie-charts at nodes indicate the probability of ancestral states. The  
873 maximum likelihood results of the ancestral states are presented in the supplementary information  
874 (Fig. S8).

875

876

877 **Appendix**

878 Reference list of all studies which generated the sequence data used in the current work

879 **Supporting Information**

880 Table S1 Sequence data used in this study and its origin

881 Table S2 Ecological and geographical data

882 Table S3 Comparison of clade ages under different calibration schemes

883 Fig. S1 Funnel plots resulting from the PhyRe analyses

884 Fig. S2 Maximum likelihood phylogeny obtained with IQTREE.

885 Fig. S3 Maximum likelihood phylogeny obtained with RAxML.

886 Fig. S4 Bayesian phylogeny obtained with ExaBayes

887 Fig. S5 Maximum parsimony phylogeny obtained with PAUP

888 Fig. S6 Fully annotated Bayesian chronogram.

889 Fig. S7 Geographical distribution of taxa used in the phylogenetic analysis.

890 Fig. S8 Maximum-likelihood reconstruction of ancestral states.

891

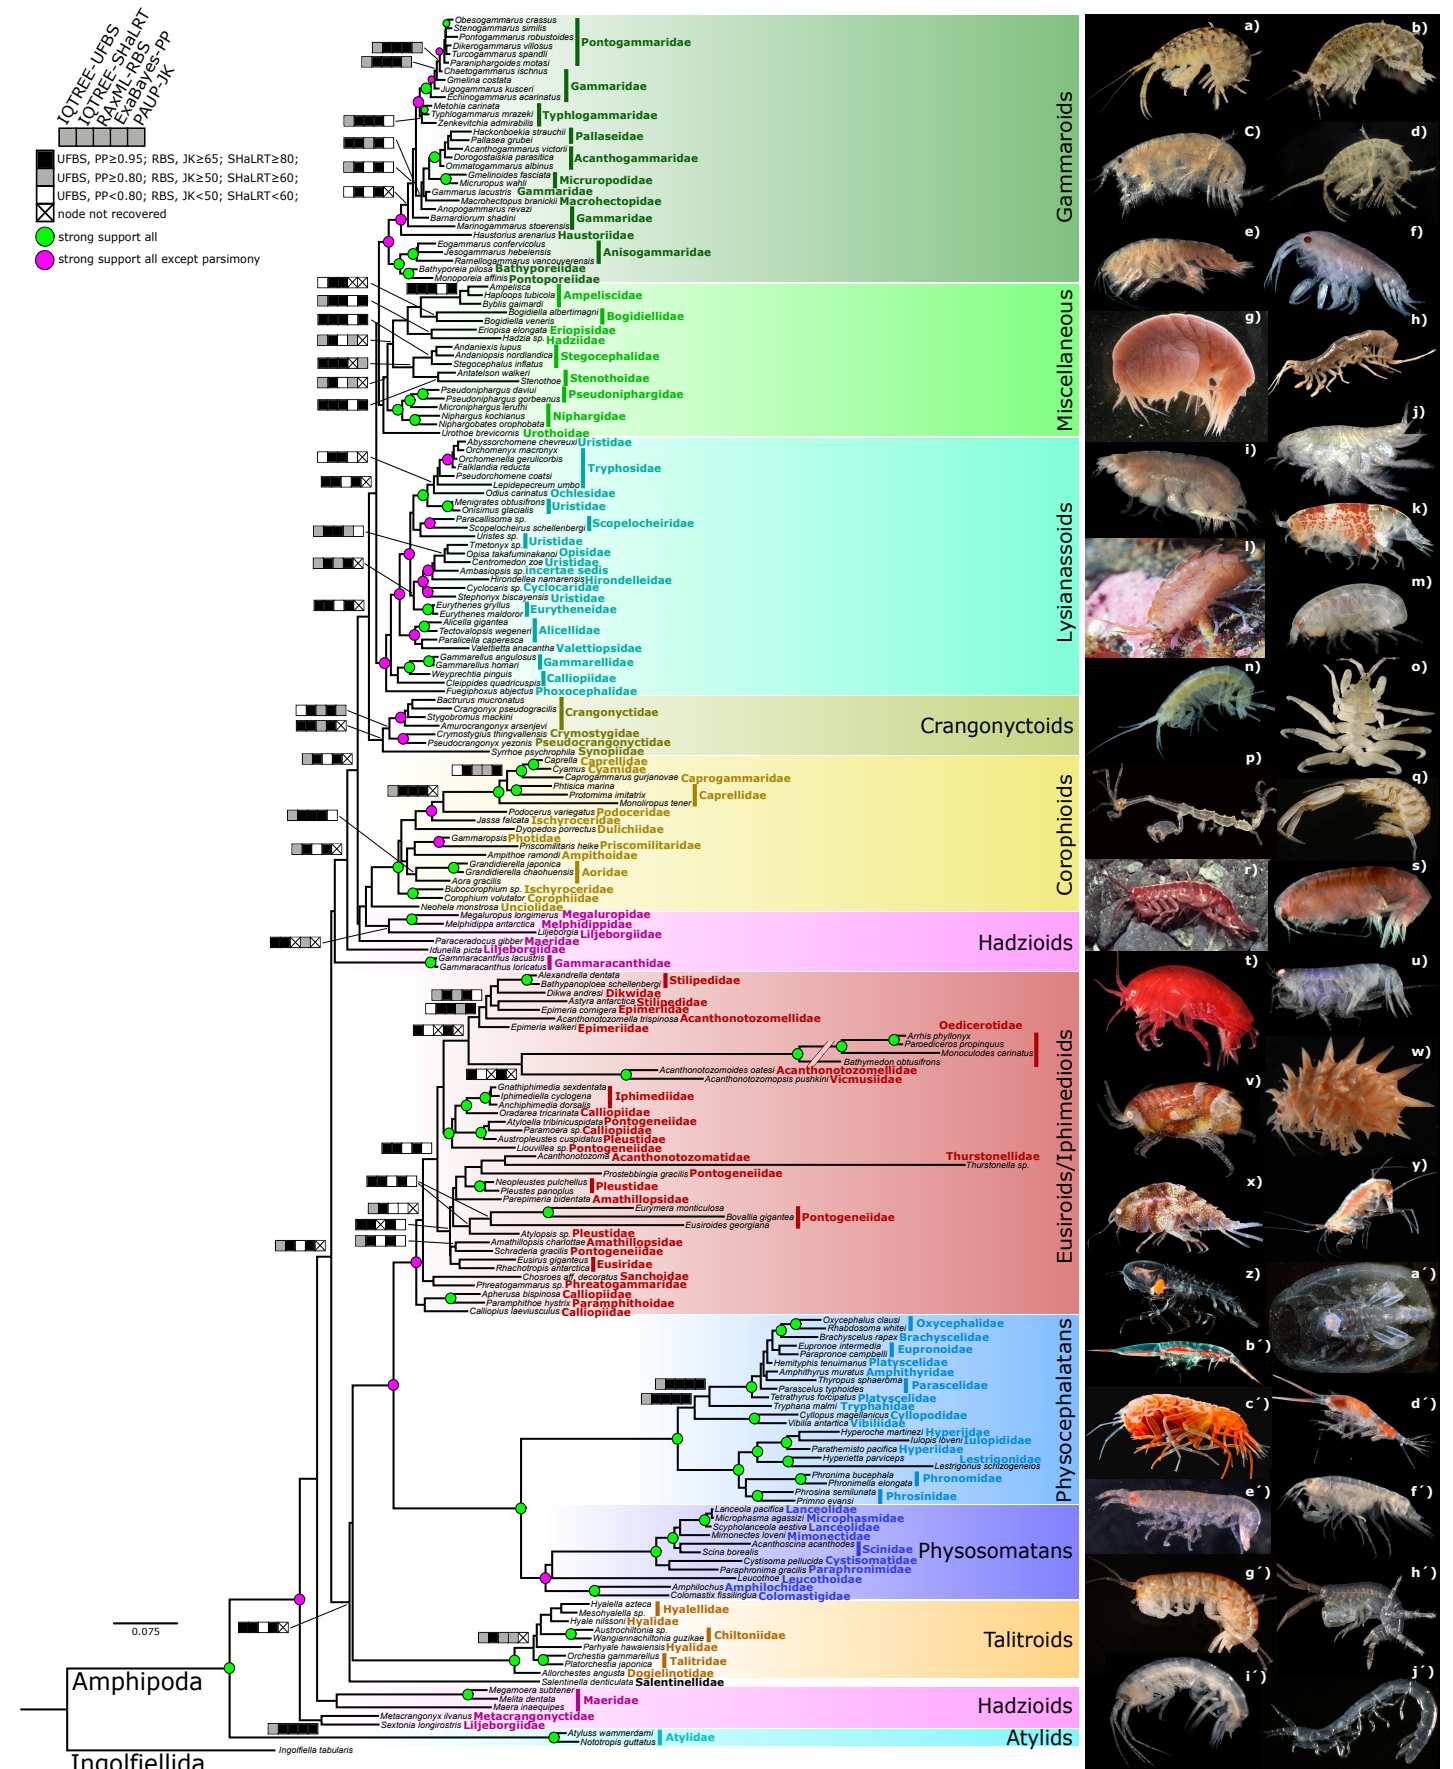

Fig. 1

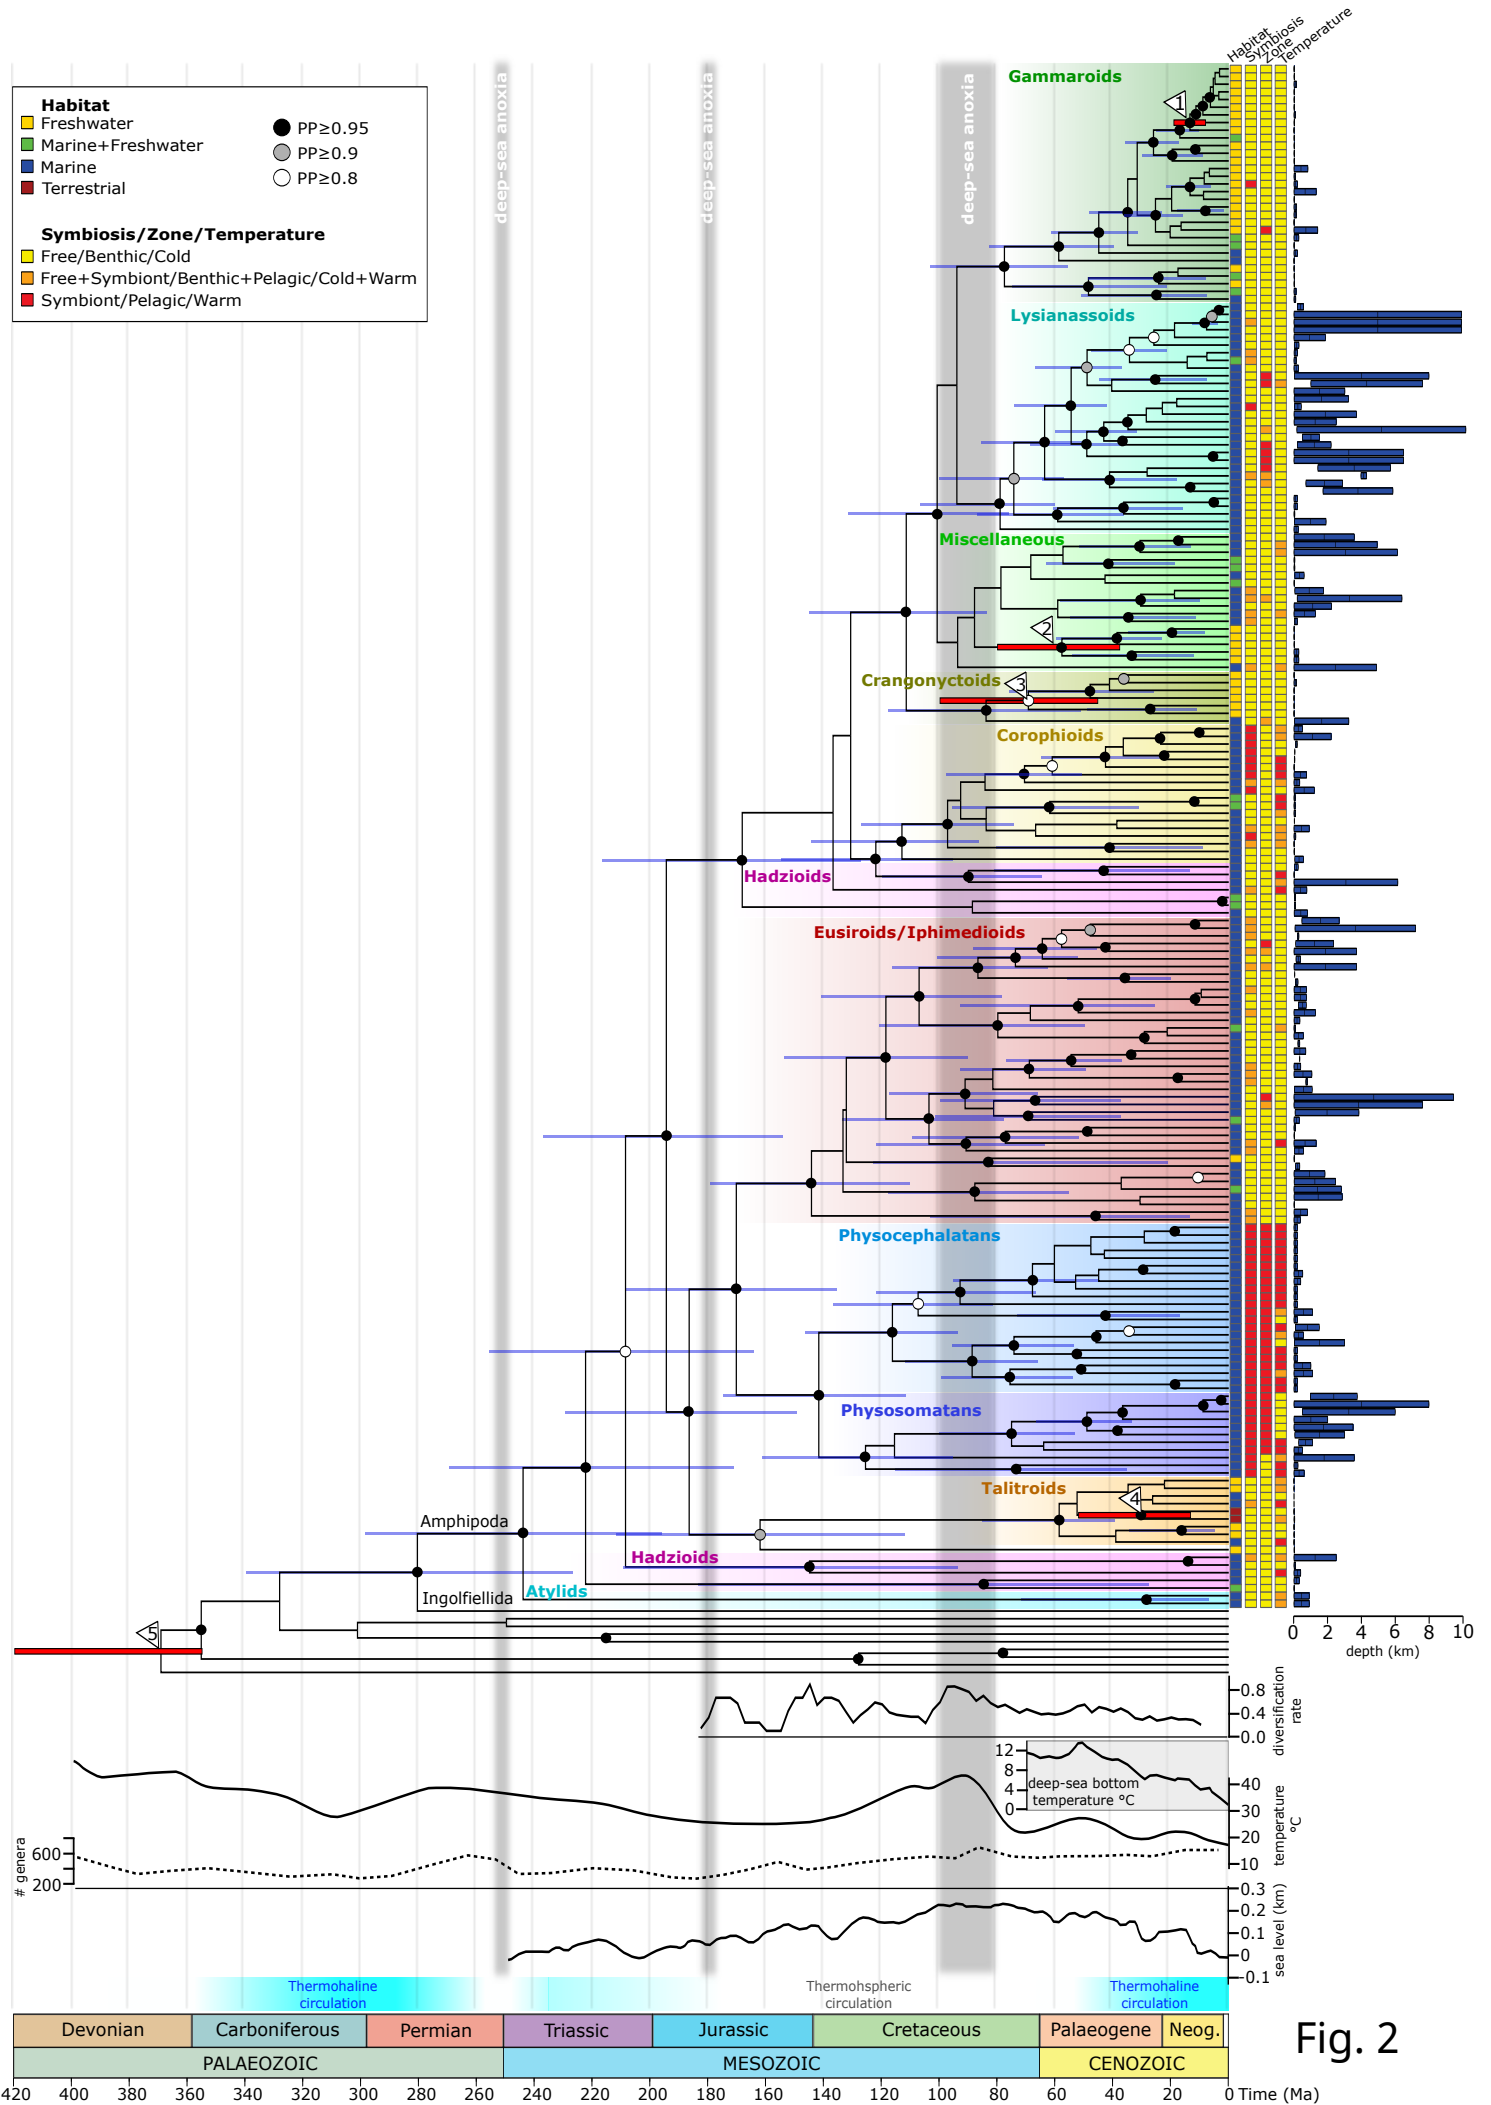

Fig. 2

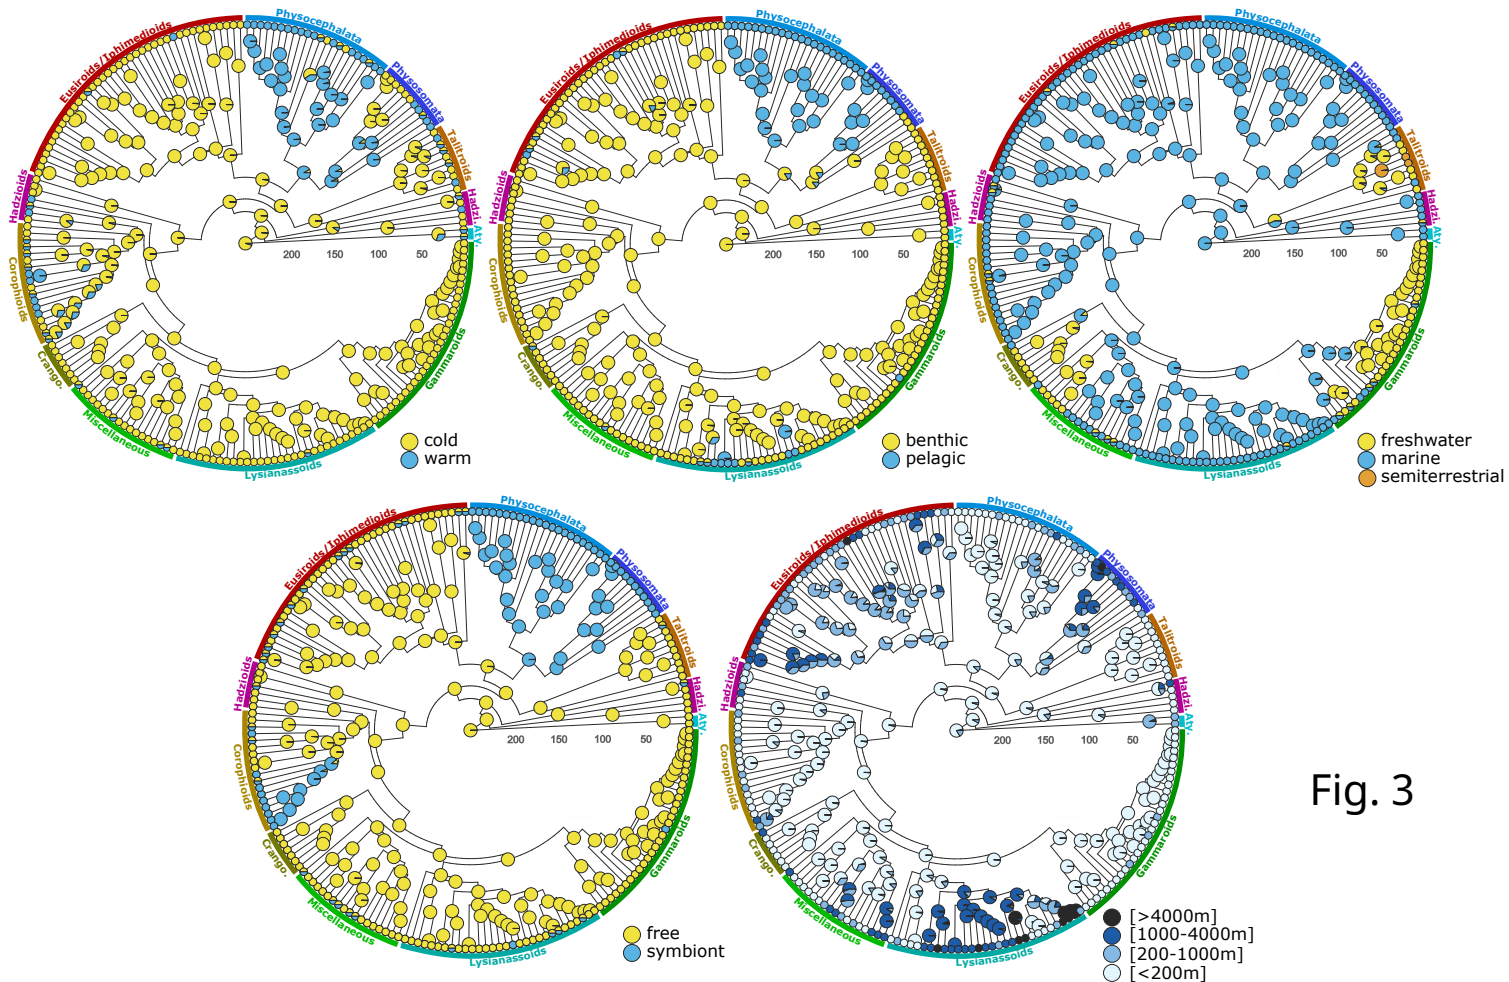

Fig. 3



## Appendix

Reference list of all studies which generated the sequence data used in the current work

- Bauzá-Ribot MM, Jaume D, Fornós JJ, Juan C, Pons J (2011) Islands beneath islands: phylogeography of a groundwater amphipod crustacean in the Balearic archipelago. *BMC Evolutionary Biology*, **11**, 221.
- Bauzá-Ribot MM, Juan C, Nardi F *et al.* (2012) Mitogenomic phylogenetic analysis supports continental-scale vicariance in subterranean thalassoid crustaceans. *Current Biology*, **22**, 2069–2074.
- Best RJ, Stachowicz JJ (2013) Phylogeny as a proxy for ecology in seagrass amphipods: which traits are most conserved? *PLoS ONE*, **8**, e57550.
- Browne WE, Haddock SHD, Martindale MQ (2007) Phylogenetic analysis of lineage relationships among hyperiid amphipods as revealed by examination of the mitochondrial gene, cytochrome oxidase I (COI). *Integrative and Comparative Biology*, **47**, 815–830.
- Corrigan LJ, Horton T, Fotherby H, White TA, Hoelzel AR (2014) Adaptive Evolution of Deep-Sea Amphipods from the Superfamily Lysiassanoidea in the North Atlantic. *Evolutionary Biology*, **41**, 154–165.
- Costa FO, deWaard JR, Boutillier J *et al.* (2007) Biological identifications through DNA barcodes: the case of the Crustacea. *Canadian Journal of Fisheries and Aquatic Sciences*, **64**, 272–295.
- Cowart DA, Pinheiro M, Mouchel O *et al.* (2015) Metabarcoding Is Powerful yet Still Blind: A Comparative Analysis of Morphological and Molecular Surveys of Seagrass Communities (S Mazzuca, Ed.). *PLoS ONE*, **10**, e0117562.
- Daneliya ME, Väinölä R (2014) Five subspecies of the *Dorogostaiskia parasitica* complex (Dybowski) (Crustacea: Amphipoda: Acanthogammaridae), epibionts of sponges in Lake Baikal. *Hydrobiologia*, **739**, 95–117.
- Dreyer H, Wägele JW (2001) Parasites of crustaceans (Isopoda: Bopyridae) evolved from fish parasites: Molecular and morphological evidence. *Zoology*, **103**, 157–178.
- Englisch U (2001) *Analysis of the phylogeny of amphipods (Crustacea, Malacostraca) using sequences of the small ribosomal subunit RNA gene*. Ruhr-Universität Bochum, Bochum.
- Englisch U, Coleman CO, Wägele JW (2003) First observations on the phylogeny of the families Gammaridae, Crangonyctidae, Melitidae, Niphargidae, Megaluroipidae and Oedicerotidae (Amphipoda, Crustacea), using small subunit rDNA gene sequences. *Journal of Natural History*, **37**, 2461–2486.
- Englisch U, Koenemann S (2001) Preliminary phylogenetic analysis of selected subterranean amphipod crustaceans, using small subunit rDNA gene sequences. *Organisms Diversity & Evolution*, **1**, 139–145.
- Esmaili-Rineh S, Sari A, Delić T, Moškrič A, Fišer C (2015) Molecular phylogeny of the subterranean genus *Niphargus* (Crustacea: Amphipoda) in the Middle East: A comparison with European Niphargids. *Zoological Journal of the Linnean Society*, **175**, 812–826.
- Fišer C, Konec M, Alther R, Švara V, Altermatt F (2017) Taxonomic, phylogenetic and ecological diversity of *Niphargus* (Amphipoda: Crustacea) in the Höllloch cave system (Switzerland). *Systematics and Biodiversity*, **15**, 218–237.
- Fišer C, Sket B, Trontelj P (2008) A phylogenetic perspective on 160 years of troubled taxonomy of *Niphargus* (Crustacea: Amphipoda). *Zoologica Scripta*, **37**, 665–680.
- Fišer C, Zagmajster M, Zakšek V (2013) Coevolution of life history traits and morphology in female subterranean amphipods. *Oikos*, **122**, 770–778.
- Havermans C (2016) Have we so far only seen the tip of the iceberg? Exploring species diversity and distribution of the giant amphipod *Eurythenes*. *Biodiversity*, **17**, 12–25.
- Havermans C, Nagy ZT, Sonet G, De Broyer C, Martin P (2010) Incongruence between molecular phylogeny and morphological classification in amphipod crustaceans: A case study of Antarctic lysianassoids. *Molecular Phylogenetics and Evolution*, **55**, 202–209.
- Henzler CM, Ingólfsson A (2008) The biogeography of the beachflea, *Orchestia gammarellus* (Crustacea, Amphipoda, Talitridae), in the North Atlantic with special reference to Iceland: a morphometric and genetic study. *Zoologica Scripta*, **37**, 57–70.
- Hiwatari T, Shinotsuka Y, Morino H, Kohata K (2011) Phylogenetic relationships among families and genera of talitroidean amphipods (Crustacea) deduced from 28S rRNA gene sequences. *Biogeography*, **13**, 1–8.
- Hou Z, Fu J, Li S (2007) A molecular phylogeny of the genus *Gammarus* (Crustacea: Amphipoda) based on mitochondrial and nuclear gene sequences. *Molecular Phylogenetics and Evolution*, **45**, 596–611.
- Hou Z, Sket B (2016) A review of Gammaridae (Crustacea: Amphipoda): The family extent, its evolutionary history, and taxonomic redefinition of genera. *Zoological Journal of the Linnean Society*, **176**, 323–348.
- Hou Z, Sket B, Fišer C, Li S (2011) Eocene habitat shift from saline to freshwater promoted Tethyan amphipod diversification. *Proceedings of the National Academy of Sciences of the United States of America*, **108**, 14533–14538.
- Hou Z, Sket B, Li S (2014) Phylogenetic analyses of Gammaridae crustacean reveal different diversification patterns among sister lineages in the Tethyan region. *Cladistics*, **30**, 352–365.
- Hurt C, Haddock SHD, Browne WE (2013) Molecular phylogenetic evidence for the reorganization of the Hyperiid amphipods, a diverse group of pelagic crustaceans. *Molecular Phylogenetics and Evolution*, **67**, 28–37.
- Ito A, Aoki MN, Yahata K, Wada H (2011) Complicated evolution of the caprellid (Crustacea: Malacostraca: Peracarida: Amphipoda) body plan, reacquisition or multiple losses of the thoracic limbs and pleons. *Development Genes and Evolution*, **221**, 133–140.
- Ito A, Wada H, Aoki MN (2008) Phylogenetic analysis of caprellid and corophioid amphipods (Crustacea) based on the 18S rRNA gene, with special emphasis on the phylogenetic position of Phtisicidae. *The Biological Bulletin*, **214**, 176–83.
- Jamieson AJ, Lacey NC, Lörz A-N, Rowden AA, Piertney SB (2013) The supergiant amphipod *Alicella gigantea* (Crustacea: Alicellidae) from hadal depths in the Kermadec Trench, SW Pacific Ocean. *Deep Sea Research Part II: Topical Studies in Oceanography*, **92**, 107–113.
- Jarman SN, Nicol S, Elliott NG, McMinn A (2000) 28S rDNA Evolution in the Eumalacostraca and the Phylogenetic Position of Krill. *Molecular Phylogenetics and Evolution*, **17**, 26–36.
- Jurado-Rivera JA, Álvarez G, Caro JA *et al.* (2017) Molecular systematics of *Haploginglymus*, a genus of subterranean amphipods endemic to the Iberian Peninsula (Amphipoda: Niphargidae). *Contributions to Zoology*, **86**, 239–260.
- Karasawa S, Goto K (2014) *Burmoniscus kitadaitoensis* Nunomura, 2009 (Crustacea, Isopoda, Oniscidea) from southern Japan, a junior synonym of *B. meusei* (Holthuis, 1947). *ZooKeys*, **386**, 21–8.
- Ki J-S, Dahms H-U, Kim I-C *et al.* (2011) Molecular relationships of gammaridean amphipods from Arctic sea ice. *Polar Biology*, **34**, 1559–1569.
- Koenemann S, Bloechl A, Leijts R (2011) *Bogidiella veneris*, a New Species of Subterranean Amphipoda (Bogidiellidae) from Australia, with Remarks on the Systematics and Biogeography. *Journal of Crustacean Biology*, **31**, 566–575.
- Kornobis E, Pálsson S, Sidorov DA, Holsinger JR, Kristjánsson BK (2011) Molecular taxonomy and phylogenetic affinities of two groundwater amphipods, *Crangonyx islandicus* and *Crymostygius thingvallensis*, endemic to Iceland. *Molecular Phylogenetics and Evolution*, **58**, 527–539.

- Lobo J, Costa PM, Teixeira M AL *et al.* (2013) Enhanced primers for amplification of DNA barcodes from a broad range of marine metazoans. *BMC Ecology*, **13**, 34.
- Macdonald KS, Yampolsky L, Duffy JE (2005) Molecular and morphological evolution of the amphipod radiation of Lake Baikal. *Molecular Phylogenetics and Evolution*, **35**, 323–343.
- McInerney CE, Maurice L, Robertson AL *et al.* (2014) The ancient Britons: Groundwater fauna survived extreme climate change over tens of millions of years across NW Europe. *Molecular Ecology*, **23**, 1153–1166.
- Murphy NP, Adams M, Guzik MT, Austin AD (2013) Extraordinary micro-endemism in Australian desert spring amphipods. *Molecular Phylogenetics and Evolution*, **66**, 645–653.
- Narahara-Nakano Y, Kakui K, Tomikawa KO (2016) *Opisa takafuminakanoi*, a new species of Opisidae from Hokkaido, Japan (Crustacea: Amphipoda). *Zootaxa*, **4200**, 335–339.
- Niemiller ML, Porter ML, Keany J *et al.* (2018) Evaluation of eDNA for groundwater invertebrate detection and monitoring: a case study with endangered Stygobromus (Amphipoda: Crangonyctidae). *Conservation Genetics Resources*, **10**, 247–257.
- Pavesi L, Wildish DJ, Gasson P, Lowe M, Ketmaier V (2015) Further morphological and molecular studies of driftwood hoppers (Crustacea: Amphipoda: Talitridae) from Mediterranean/north-east Atlantic coastlines. *Journal of Natural History*, **49**, 1047–1071.
- Pilgrim EM, Blum MJ, Reusser DA, Lee H, Darling JA (2013) Geographic range and structure of cryptic genetic diversity among Pacific North American populations of the non-native amphipod *Granddierella japonica*. *Biological Invasions*, **15**, 2415–2428.
- Porter ML, Pérez-Losada M, Crandall KA (2005) Model-based multi-locus estimation of decapod phylogeny and divergence times. *Molecular Phylogenetics and Evolution*, **37**, 355–369.
- Radulovici AE, Sainte-Marie B, Dufresne F (2009) DNA barcoding of marine crustaceans from the Estuary and Gulf of St Lawrence: a regional-scale approach. *Molecular Ecology Resources*, **9**, 181–187.
- Raupach MJ, Barco A, Steinke D *et al.* (2015) The Application of DNA Barcodes for the Identification of Marine Crustaceans from the North Sea and Adjacent Regions. *PLOS ONE*, **10**, e0139421.
- Ritchie H, Jamieson AJ, Piertney SB (2015) Phylogenetic relationships among hadal amphipods of the Superfamily Lysianassoidea: Implications for taxonomy and biogeography. *Deep Sea Research Part I: Oceanographic Research Papers*, **105**, 119–131.
- Schnabel KE, Hebert PDN (2003) Resource-associated divergence in the arctic marine amphipod *Paramphithoe hystrix*. *Marine Biology*, **143**, 851–857.
- Sotka EE, Bell T, Hughes LE, Lowry JK, Poore AGB (2017) A molecular phylogeny of marine amphipods in the herbivorous family Ampithoidae. *Zoologica Scripta*, **46**, 85–95.
- Spears T, DeBry RW, Abele LG, Chodyla K (2005) Peracarid monophyly and interordinal phylogeny inferred from nuclear small-subunit ribosomal DNA sequences (Crustacea: Malacostraca: Peracarida). *Proceedings of the Biological Society of Washington*, **118**, 117–157.
- Stenderup JT, Olesen J, Glenner H (2006) Molecular phylogeny of the Branchiopoda (Crustacea)—Multiple approaches suggest a ‘diplostracan’ ancestry of the Notostraca. *Molecular Phylogenetics and Evolution*, **41**, 182–194.
- Tomikawa K, Nakano T, Sato A, Onodera S, Ohtaka A (2016a) A molecular phylogeny of *Pseudocrangonyx* from Japan, including a new subterranean species (Crustacea, Amphipoda, Pseudocrangonyctidae). *Zoosystematics and Evolution*, **92**, 187–202.
- Tomikawa K, Tanaka H, Nakano T (2016b) A new species of the rare genus *Priscomilitaris* from the Seto Inland Sea, Japan (Crustacea, Amphipoda, Priscomilitaridae). *ZooKeys*, 25–35.
- Trontelj P, Blejec A, Fišer C (2012) Ecomorphological convergence of cave communities. *Evolution*, **66**, 3852–3865.
- Verheye ML, Bäckeljaug T, d’Udekem d’Acoz C (2016a) Looking beneath the tip of the iceberg: diversification of the genus *Epimeria* on the Antarctic shelf (Crustacea, Amphipoda). *Polar Biology*, **39**, 925–945.
- Verheye ML, Bäckeljaug T, d’Udekem d’Acoz C (2017) Locked in the icehouse: Evolution of an endemic *Epimeria* (Amphipoda, Crustacea) species flock on the Antarctic shelf. *Molecular Phylogenetics and Evolution*, **114**, 14–33.
- Verheye ML, Martin P, Bäckeljaug T, D’Udekem D’Acoz C (2016b) DNA analyses reveal abundant homoplasy in taxonomically important morphological characters of Eusiroidea (Crustacea, Amphipoda). *Zoologica Scripta*, **45**, 300–321.
- Villacorta C, Jaime D, Oromí P, Juan C (2008) Under the volcano: phylogeography and evolution of the cave-dwelling *Palmorchestia hypogaea* (Amphipoda, Crustacea) at La Palma (Canary Islands). *BMC Biology*, **6**, 7.
- Wetzer R (2001) Hierarchical analysis of mtDNA variation and the use of mtDNA for isopod (Crustacea: Peracarida: Isopoda) systematics. *Contributions to Zoology*, **70**, 23–39.
- White KN (2011) Nuclear 18S rDNA As A Species-Level Molecular Marker for Leucothoidae (Amphipoda). *Journal of Crustacean Biology*, **31**, 710–716.
- White KN, Reimer JD (2012) DNA phylogeny of Ryukyus Leucothoidae (Crustacea: Amphipoda). *Contributions to Zoology*, **81**, 159–165.
- White KN, Reimer JD, Lorion J (2016) Preliminary analyses reveal strong genetic structure in populations of *Leucothoe vulgaris* (Crustacea: Amphipoda: Leucothoidae) from Okinawa, Japan. *Systematics and Biodiversity*, **14**, 55–62.
- Witt JDS, Threlloff DL, Hebert PDN (2006) DNA barcoding reveals extraordinary cryptic diversity in an amphipod genus: Implications for desert spring conservation. *Molecular Ecology*, **15**, 3073–3082.
- Yang L, Hou Z, Li S (2013) Marine incursion into East Asia: a forgotten driving force of biodiversity. *Proceedings of the Royal Society B: Biological Sciences*, **280**, 20122892.
